# Supplementary material for: Killing two birds with one stone: phosphorylation by a tabun mimic and subsequent capture of cyanide using a single fluorescent chemodosimeter
Source: Royal Society of Chemistry journal article supplement (doi:10.1039/d2nj04014j), 2022-01-01
Supplement: d2nj04014j1.pdf [file d2nj04014j1.pdf]

## Supporting Information for

### **Killing Two Birds with One Stone: Phosphorylation by a Tabun Mimic and Subsequent Capture of Cyanide Using a Single Fluorescent Chemodosimeter**

Rashid Mia<sup>a</sup>, Peter J. Cragg<sup>b</sup>, Frank R. Fronczek<sup>c</sup> and Karl J. Wallace<sup>a\*</sup>

- a) Department of Chemistry and Biochemistry, University of Southern Mississippi, Hattiesburg, Mississippi 39406, USA.
- b) School of Applied Sciences, University of Brighton, Brighton, BN2 4GJ, UK
- c) Department of Chemistry, Louisiana State University, Baton Rouge, Louisiana, 70803, USA

| <b>Table of contents</b>                                                                 | <b>Page N<sup>o</sup></b> |
|------------------------------------------------------------------------------------------|---------------------------|
| 1. NMR Spectra of <b>4a</b>                                                              | S2-S10                    |
| 2. X-ray crystallography structure and packing                                           | S10                       |
| 3. UV-Vis and Fluorescence spectroscopy                                                  | S11-S15                   |
| 4. Fluorescence Lifetime of <b>4a</b> , <b>4a</b> -oximate and adducts and model systems | S16-S18                   |
| 5. 1D and 2D NMR spectra for <b>4a</b> plus KCN                                          | S19-S25                   |
| 6. In situ NMR Experiments; <b>4a</b> plus DECP                                          | S25-S26                   |
| 7. Mass spectrometry                                                                     | S26-S28                   |
| 8. Molecular modelling                                                                   | S28                       |
| 9. Limit of Detection                                                                    | S29                       |
| 10. X-ray crystallographic Tables                                                        | S30 to S35                |
| 11. References                                                                           | S36                       |

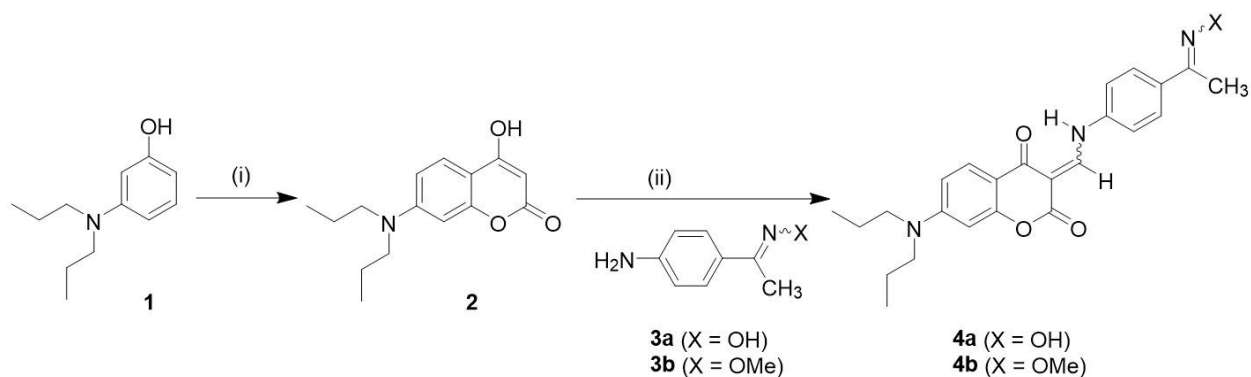

**Scheme S1:** Synthetic route of **4a** and **4b**; (i) magic malonate, toluene, heated under reflux (ii) triethyl orthoformate, iso-propanol, heated under reflux.

## 1. 1D and 2D NMR spectra for 4a

**Table S1.**  $^1\text{H}$  and  $^{13}\text{C}$  NMR assignment for **4a** in  $\text{DMSO-}d_6$  at 298 K.

|           | $^1\text{H}$ NMR<br>(ppm, $J = \text{Hz}$ )              | $^1\text{H}$ NMR<br>(ppm, $J = \text{Hz}$ )              | $^{13}\text{C}$<br>NMR<br>(ppm) | $^{13}\text{C}$<br>NMR<br>(ppm) |
|-----------|----------------------------------------------------------|----------------------------------------------------------|---------------------------------|---------------------------------|
|           | <i>E</i>                                                 | <i>Z</i>                                                 | <i>E</i>                        | <i>Z</i>                        |
| 2         | NA                                                       | NA                                                       | 162.9                           | 164.0                           |
| 3         | NA                                                       | NA                                                       | 97.5                            | 97.8                            |
| 4         | NA                                                       | NA                                                       | 179.5                           | 176.0                           |
| 4a        | NA                                                       | NA                                                       | 153.1                           | 153.0                           |
| 5         | 7.7 (m)                                                  | 7.7 (m)                                                  | 127.3                           | 127.3                           |
| 6         | 6.63 to 6.65 (m)                                         | 6.63 to 6.65 (m)                                         | 108.6                           | 108.6                           |
| 7         | NA                                                       | NA                                                       | 107.8                           | 108.1                           |
| 8         | 6.35 ( <i>d</i> , $J = 2.35$ )                           | 6.39 ( <i>d</i> , $J = 2.35$ )                           | 96.5                            | 96.6                            |
| 8a        | NA                                                       | NA                                                       | 156.5                           | 156.3                           |
| 9         | 8.75 ( <i>d</i> , $J = 13.4$ )                           | 8.80 ( <i>d</i> , $J = 14.5$ )                           | 153.3                           | 151.8                           |
| 10        | NA                                                       | NA                                                       | 138.2                           | 138.7                           |
| 11/11'    | 7.56 to 7.55 ( <i>d</i> , $J = 8.95$ )                   | 7.56 to 7.55 ( <i>d</i> , $J = 8.95$ )                   | 118.3                           | 118.8                           |
| 12/12'    | 7.7 (m)                                                  | 7.7 (m)                                                  | 126.8                           | 126.9                           |
| 13        | NA                                                       | NA                                                       | 134.8                           | 134.8                           |
| 14        | NA                                                       | NA                                                       | 152.1                           | 152.1                           |
| 15        | 2.15 (s)                                                 | 2.15 (s)                                                 | 11.3                            | 11.3                            |
| 16        | 3.30 (m)*                                                | 3.30 (m)*                                                | 51.9                            | 51.9                            |
| 17        | 1.56 ( <i>h</i> , $J = 7.41, 7.41,$<br>7.48, 7.48, 7.48) | 1.56 ( <i>h</i> , $J = 7.41, 7.41,$<br>7.48, 7.48, 7.48) | 19.9                            | 19.9                            |
| 18        | 0.90 ( <i>t</i> , $J = 7.41, 7.41$ )                     | 0.90 ( <i>t</i> , $J = 7.41, 7.41$ )                     | 11.0                            | 11.0                            |
| NH        | 13.5 ( <i>d</i> , $J = 13.5$ )                           | 11.57 ( <i>d</i> , $J = 14.5$ )                          | NA                              | NA                              |
| OH(oxime) | 11.2 (s)                                                 | 11.2 (s)                                                 | NA                              | NA                              |

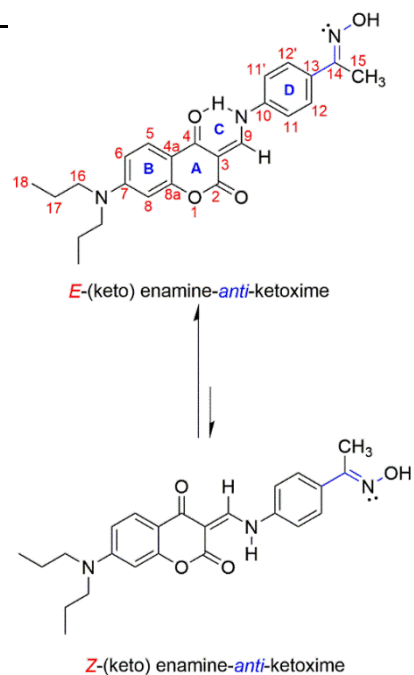

\* Signal partially obscured by DMSO

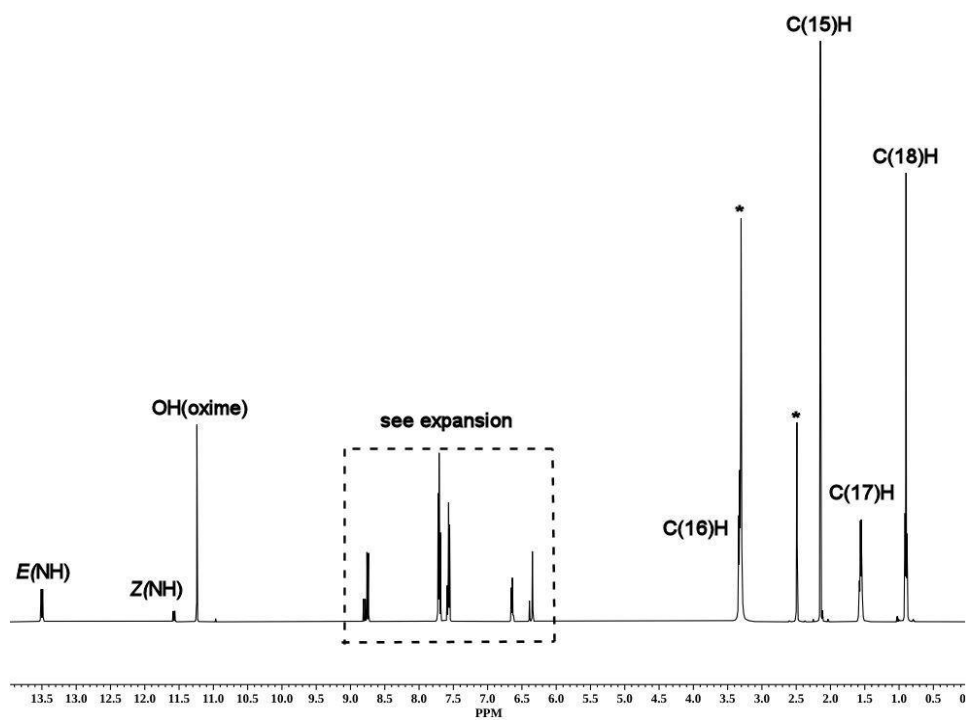

Figure S1. <sup>1</sup>H-NMR spectrum of **4a** in DMSO-*d*<sub>6</sub> at 298 K.

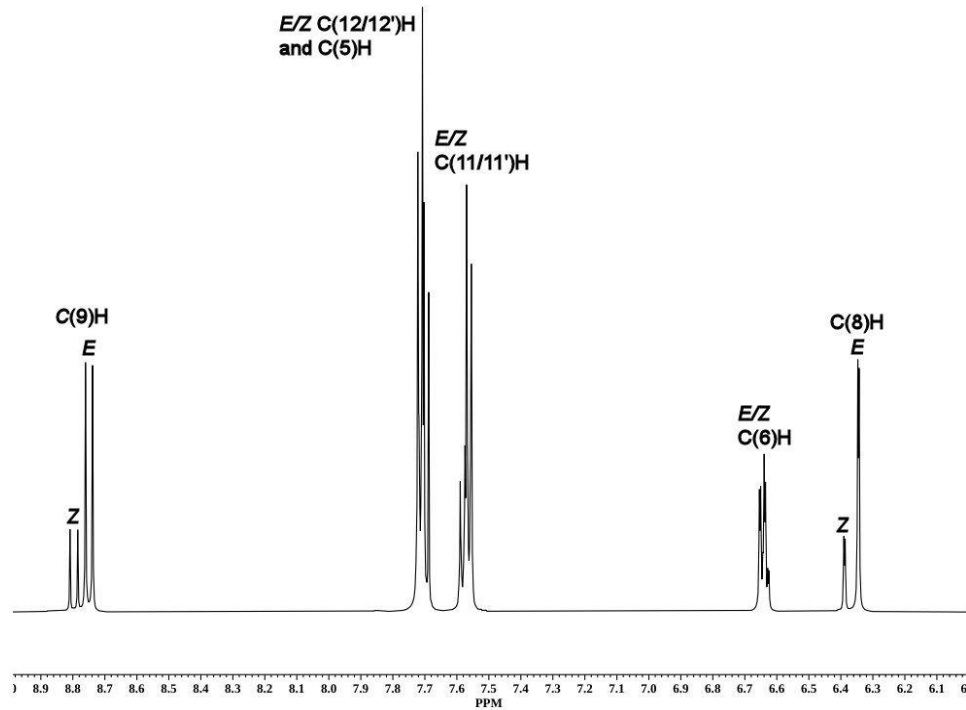

Figure S2. <sup>1</sup>H-NMR spectrum (expansion-aromatic region) of **4a** in DMSO-*d*<sub>6</sub> at 298 K.

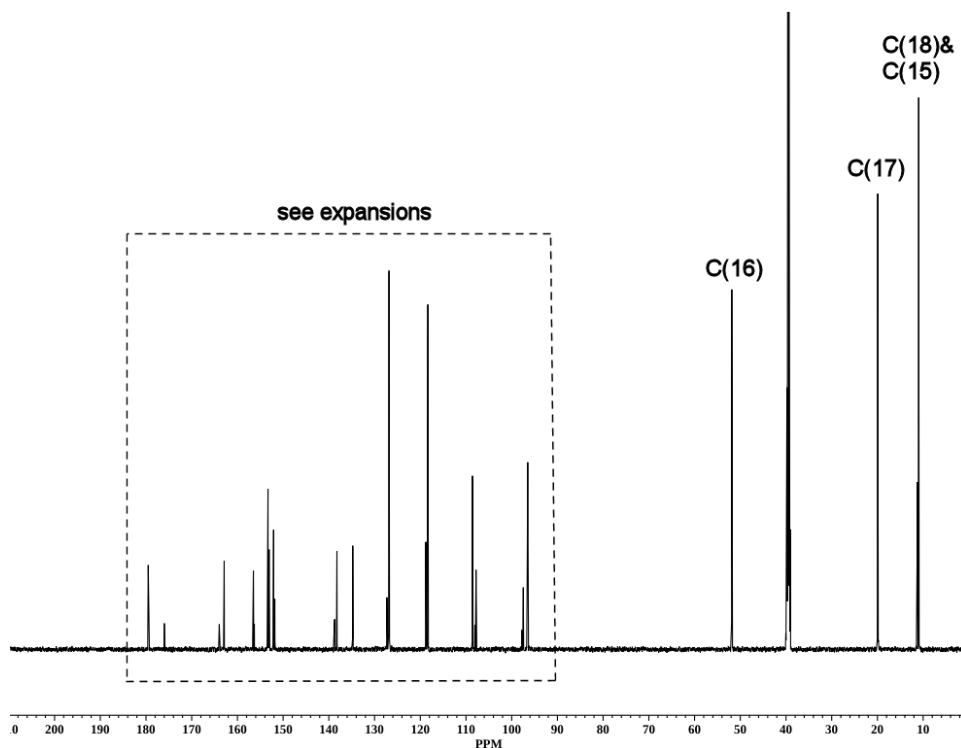

**Figure S3.**  $^{13}\text{C}$ -NMR spectrum of **4a** in  $\text{DMSO-}d_6$  at 298 K.

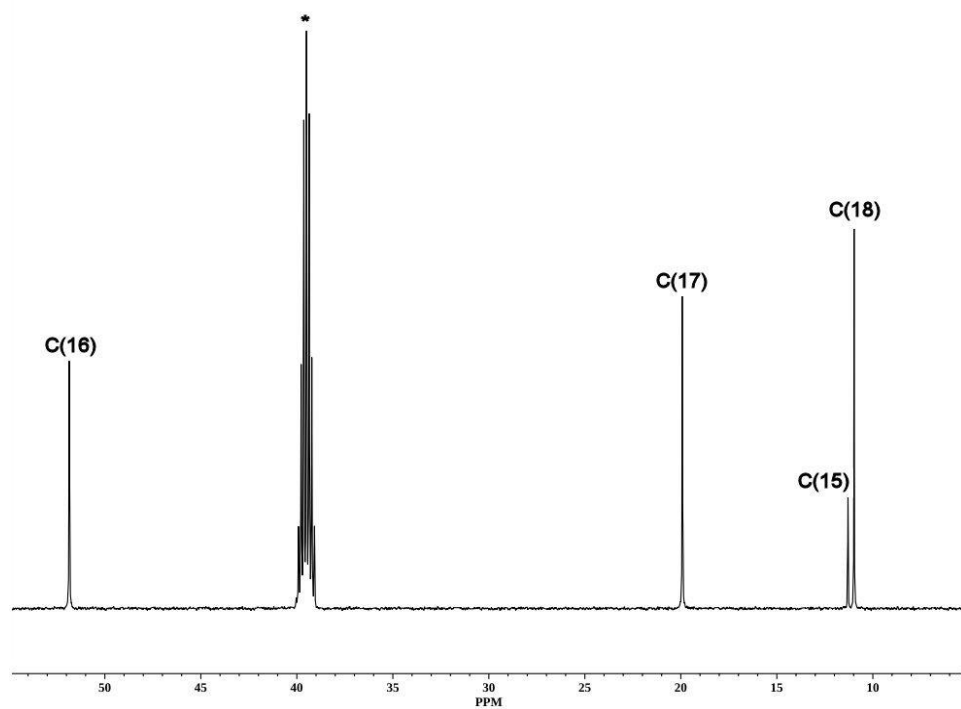

**Figure S4.**  $^{13}\text{C}$ -NMR spectrum (expansion 5 to 55 ppm) of **4a** in  $\text{DMSO-}d_6$  at 298 K.

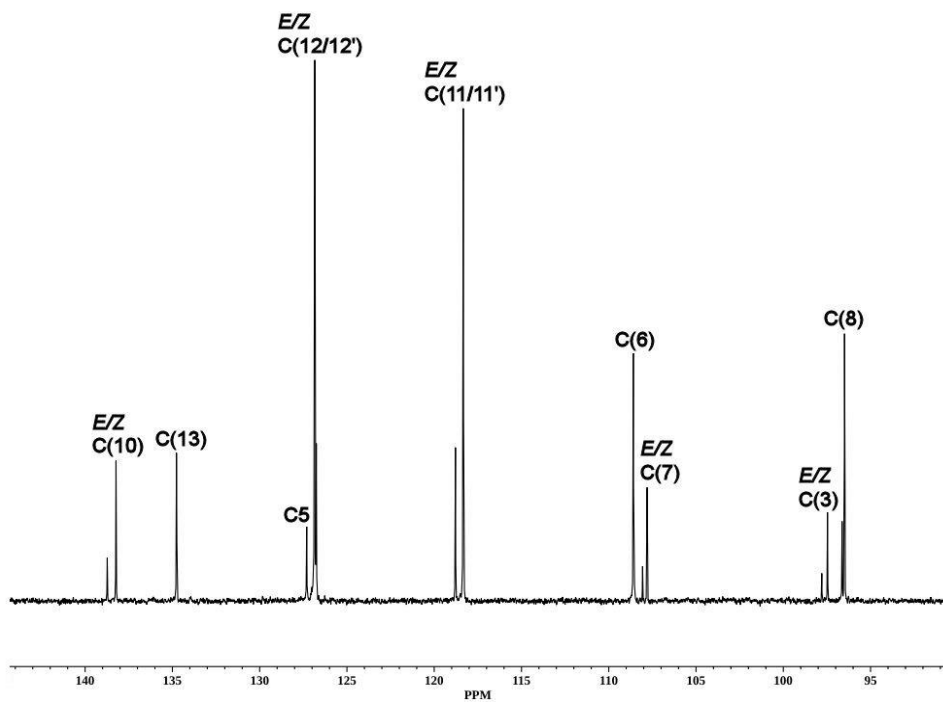

**Figure S5.**  $^{13}\text{C}$ -NMR spectrum (expansion 90 to 145 ppm) of **4a** in  $\text{DMSO-}d_6$  at 298 K.

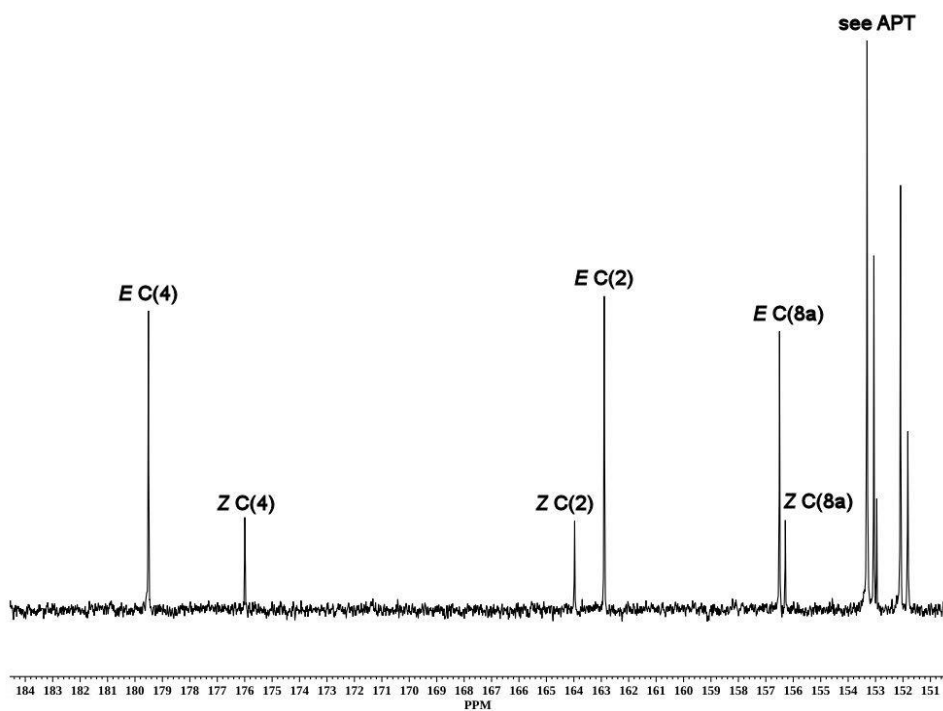

**Figure S6.**  $^{13}\text{C}$ -NMR spectrum (expansion 150 to 185 ppm) of **4a** in  $\text{DMSO-}d_6$  at 298 K.

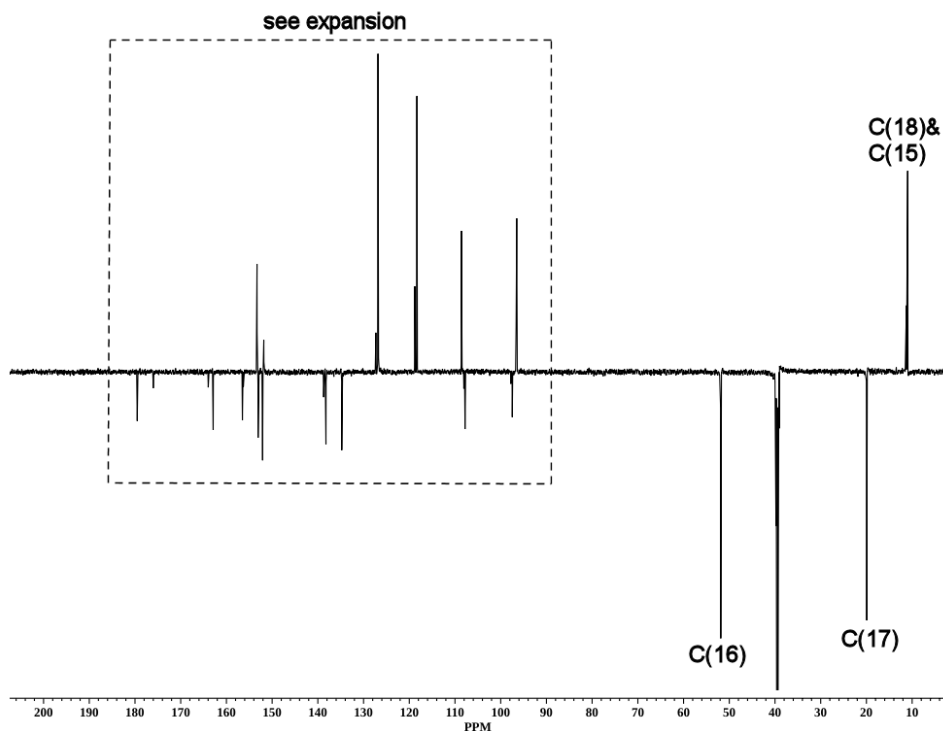

**Figure S7.**  $^{13}\text{C}$ -APT NMR spectrum of **4a** in  $\text{DMSO-}d_6$  at 298 K.

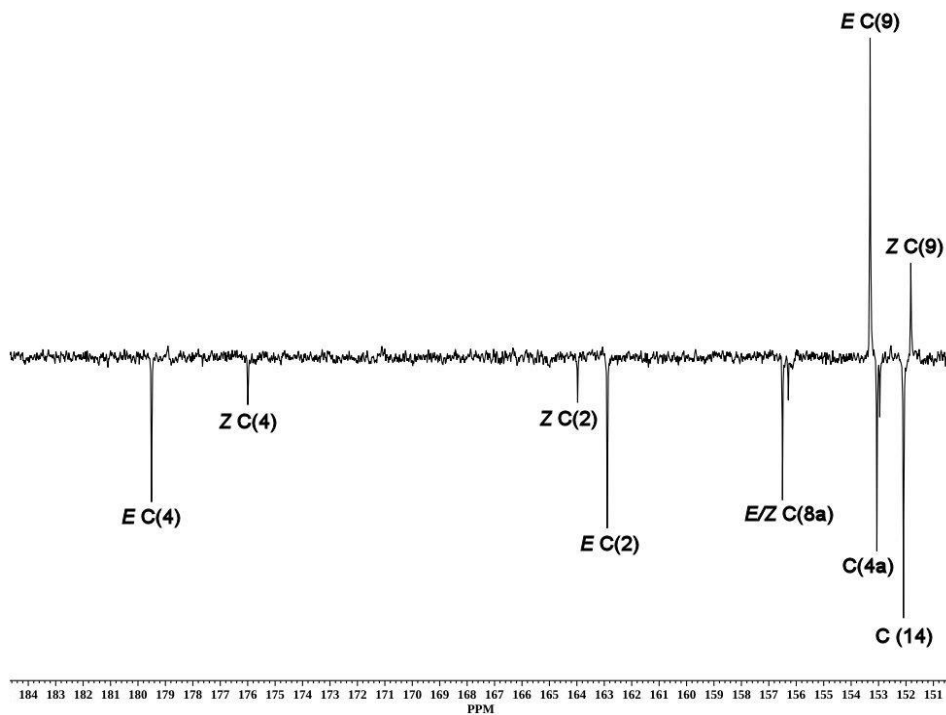

**Figure S8.**  $^{13}\text{C}$ -APT NMR spectrum (expansion 150 to 185 ppm) of **4a** in  $\text{DMSO-}d_6$  at 298 K.

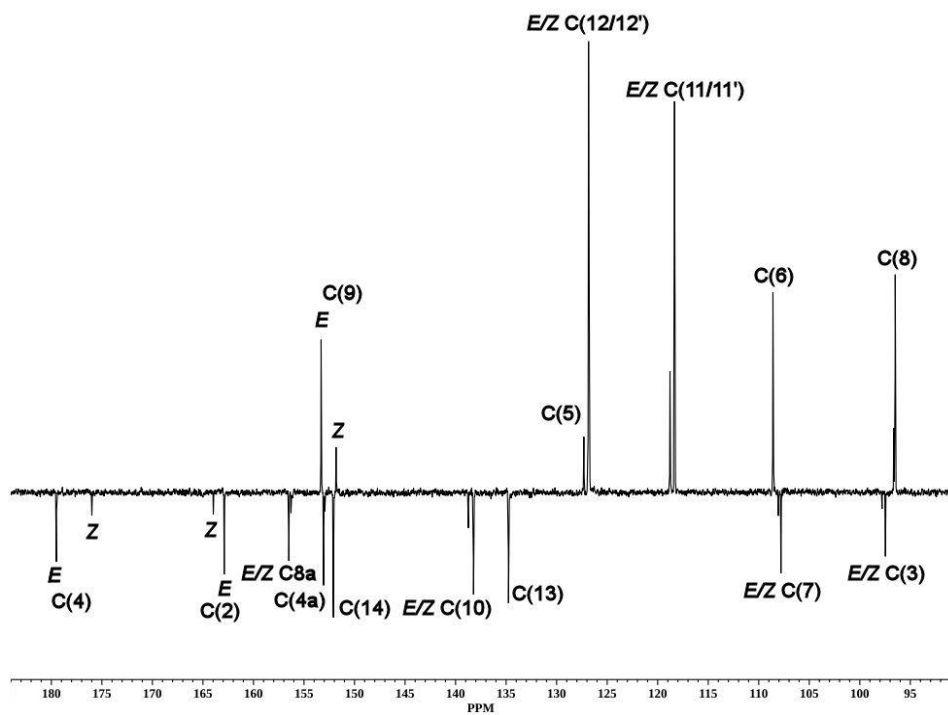

**Figure S9.**  $^{13}\text{C}$ -APT NMR spectrum (expansion 90 to 185 ppm) of **4a** in  $\text{DMSO-}d_6$  at 298 K.

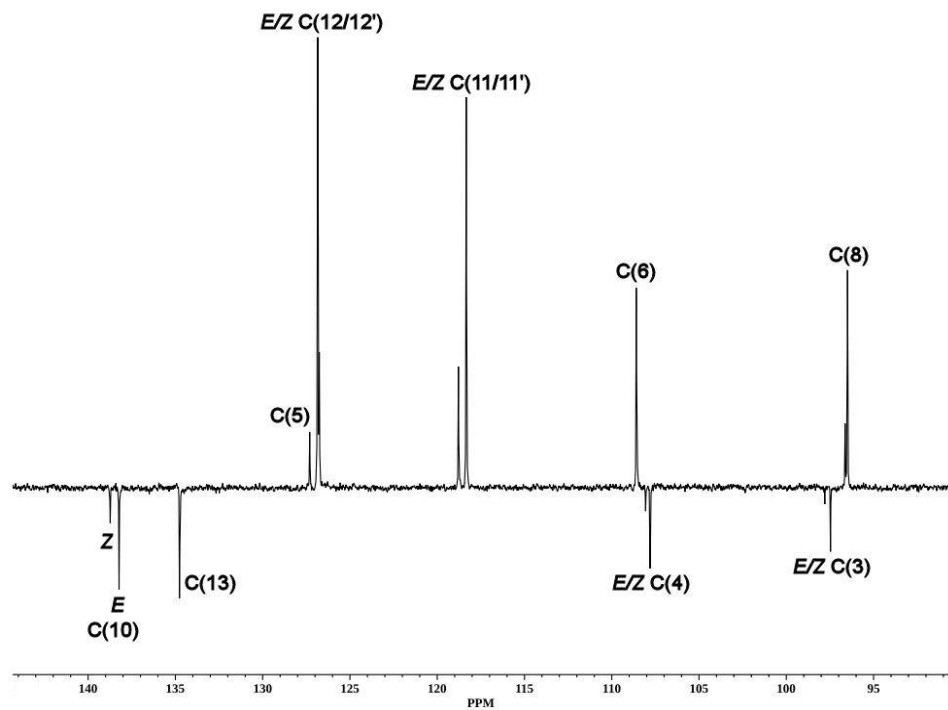

**Figure S10.**  $^{13}\text{C}$ -APT NMR spectrum (expansion 90 to 145 ppm) of **4a** in  $\text{DMSO-}d_6$  at 298 K.

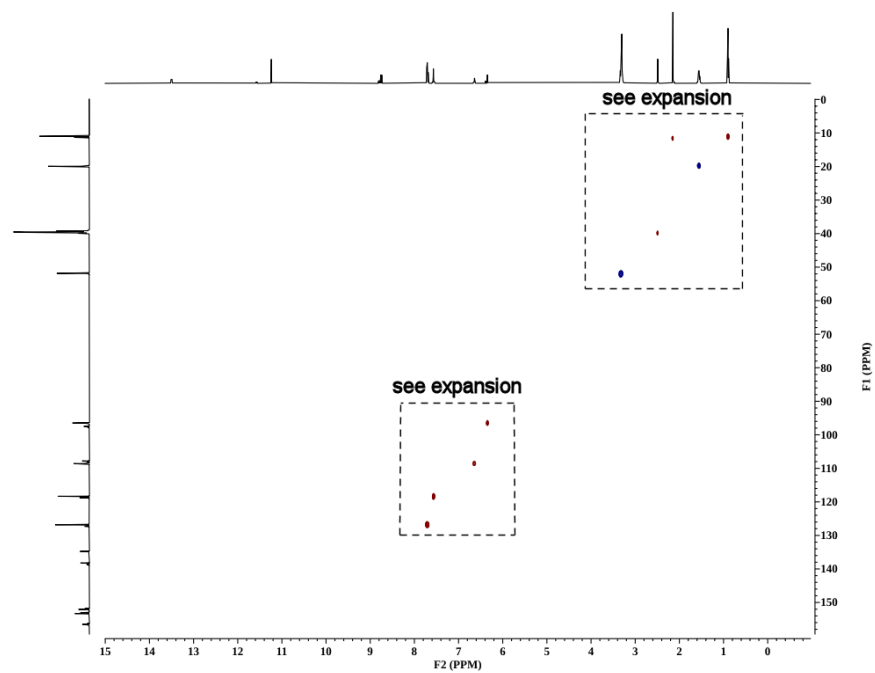

**Figure S11.** HSQC spectrum of **4a** in DMSO- $d_6$  at 298 K.

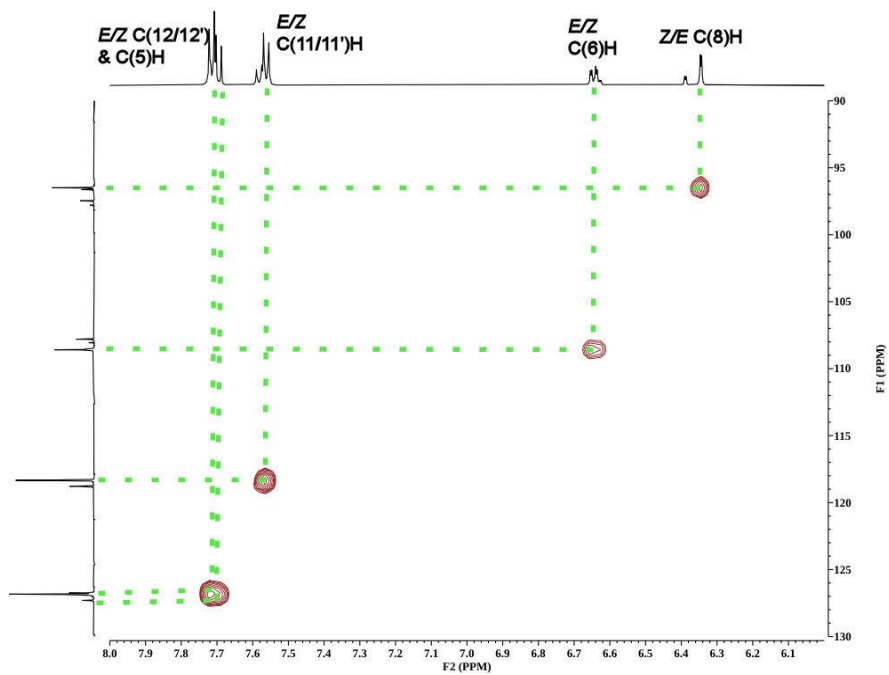

**Figure S12.** HSQC spectrum (expansion aromatic region) of **4a** in DMSO- $d_6$  at 298 K.



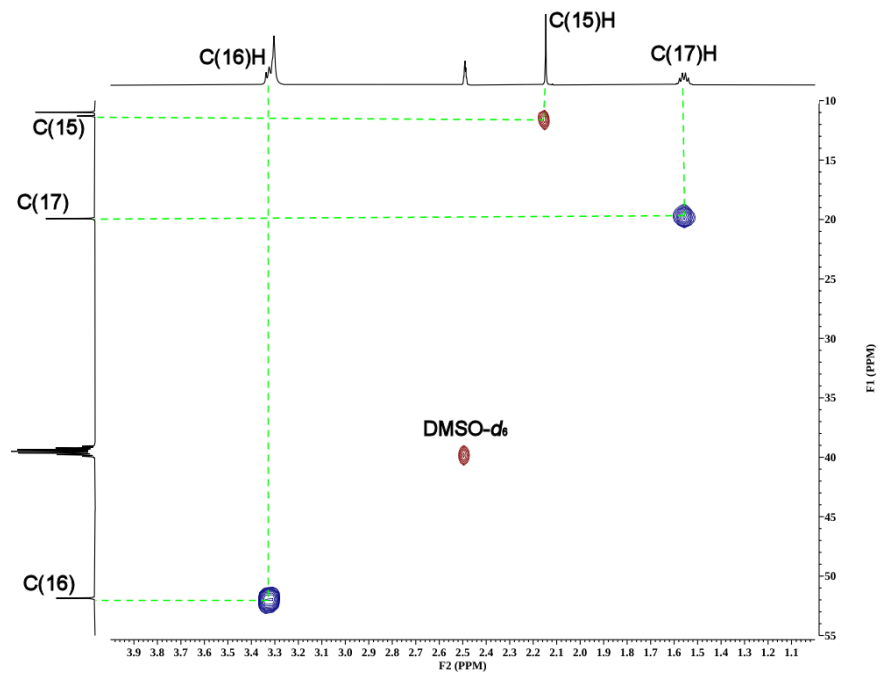

Figure S13. HSQC spectrum (expansion 0.5 to 4.0 ppm) of **4a** in DMSO- $d_6$  at 298 K.

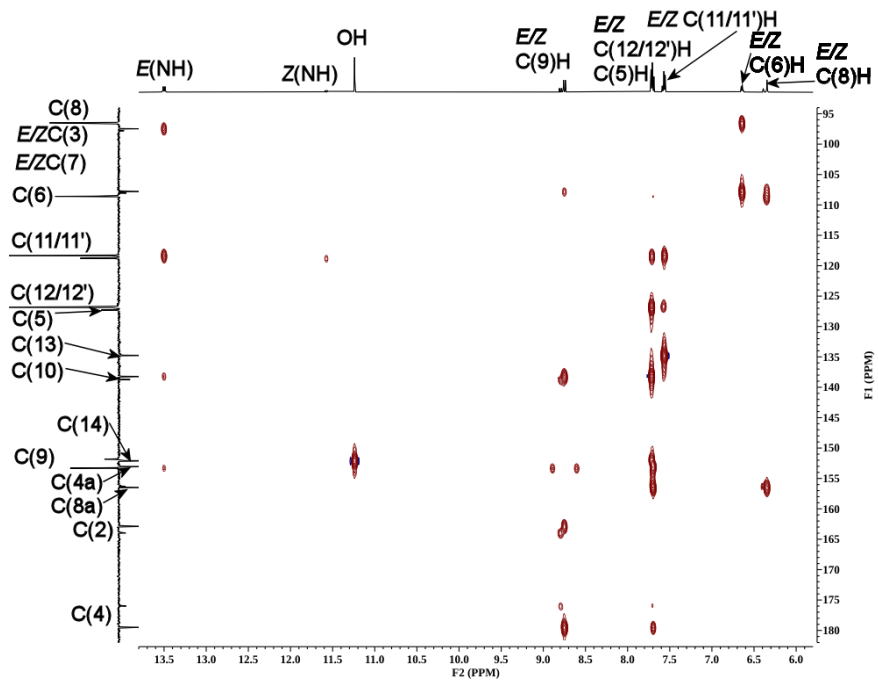

Figure S14. HMBC spectrum (expansion aromatic) of **4a** in DMSO- $d_6$  at 298 K.

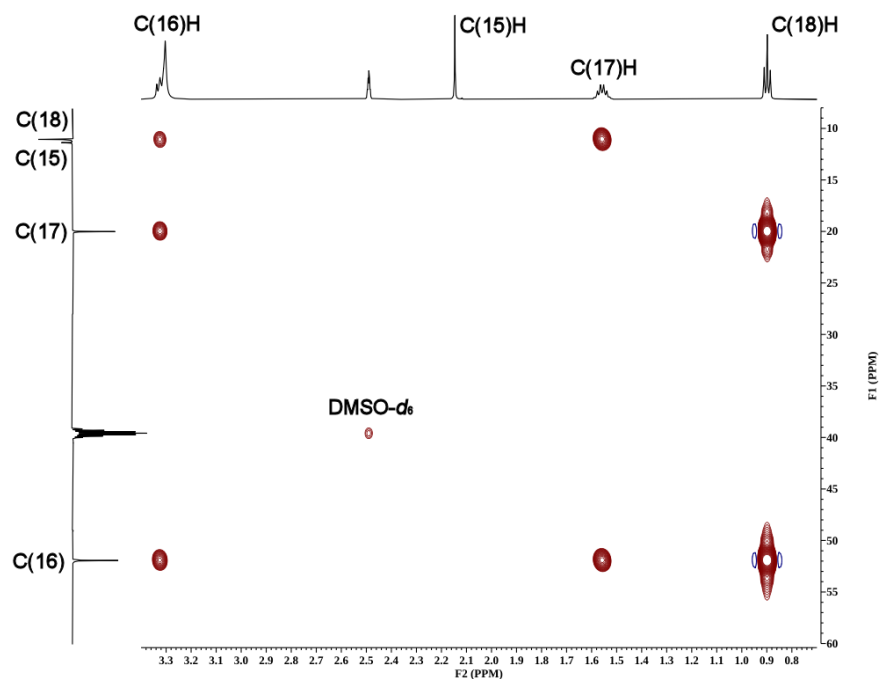

Figure S15. HMBC spectrum (expansion 0.5 to 3.5 ppm) of **4a** in DMSO- $d_6$  at 298 K.

## 2. X-ray crystallography structure and packing

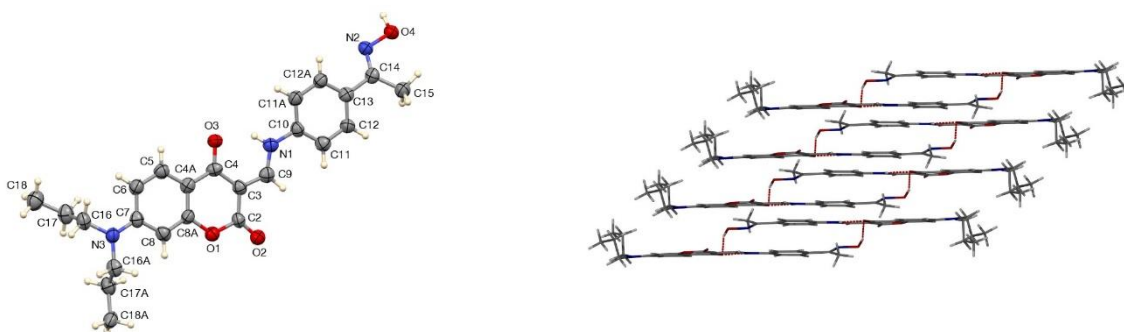

Figure S16. (Left) The molecular structure of **4a**, showing displacement ellipsoids at the 50% probability level, (right) crystal packing.

Table S2. Fluorescence lifetimes ( $\tau$ ) of four tautomer's of **4a** data collected at 298 K.

| <b>4a</b>        |             | $\tau_1$ (ns)<br>(3 $\sigma$ ) | $\tau_2$ (ns)<br>(3 $\sigma$ ) | $\bar{\tau}$ (ns)<br>(3 $\sigma$ ) | A<br>(3 $\sigma$ ) | $\chi^2$    | Norm. pre-exponential |             |
|------------------|-------------|--------------------------------|--------------------------------|------------------------------------|--------------------|-------------|-----------------------|-------------|
| <b>Em 530 nm</b> | Run (1)     | 0.79(8)                        | 1.57(2)                        | 1.54(8)                            | 2.6 (5)            | 1.16        | 0.03                  | 0.97        |
|                  | Run (2)     | 0.82(5)                        | 1.56(3)                        | 1.53(6)                            | 2.5(4)             | 1.20        | 0.04                  | 0.96        |
|                  | <b>Avg.</b> | <b>0.81(7)</b>                 | <b>1.57(3)</b>                 | <b>1.54(7)</b>                     | <b>1.6(5)</b>      | <b>1.18</b> | <b>0.04</b>           | <b>0.96</b> |
| <b>Em 590 nm</b> | Run (1)     | 0.23(3)                        | 1.54(2)                        | 1.07(3)                            | 1.3(5)             | 1.13        | 0.36                  | 0.64        |
|                  | Run (1)     | 0.27(4)                        | 1.55(4)                        | 1.09(4)                            | 1.0(5)             | 1.12        | 0.36                  | 0.64        |
|                  | <b>Avg.</b> | <b>0.25(4)</b>                 | <b>1.6(2)</b>                  | <b>1.08(4)</b>                     | <b>1.2 (5)</b>     | <b>1.13</b> | <b>0.36</b>           | <b>0.64</b> |

### 3. UV-Vis and Fluorescence spectroscopy of 4a, 4a-oximate and adducts and model systems

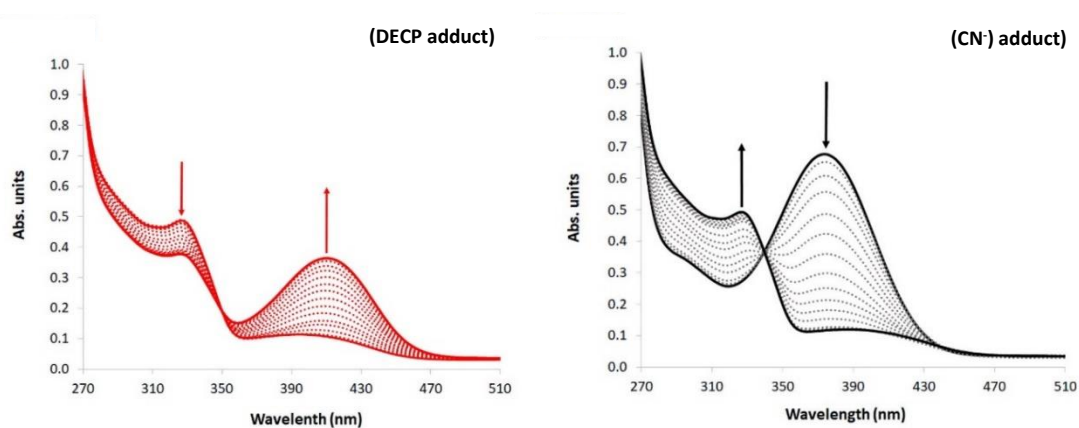

**Figure S17.** UV-vis titration of 4a-ketoximate ( $16 \mu\text{mol}\cdot\text{dm}^{-3}$ , DMSO, 298 K) upon the addition of DECP. The deconvoluted spectra show the phosphorylated adduct (left) and the CN<sup>-</sup> adduct (right).

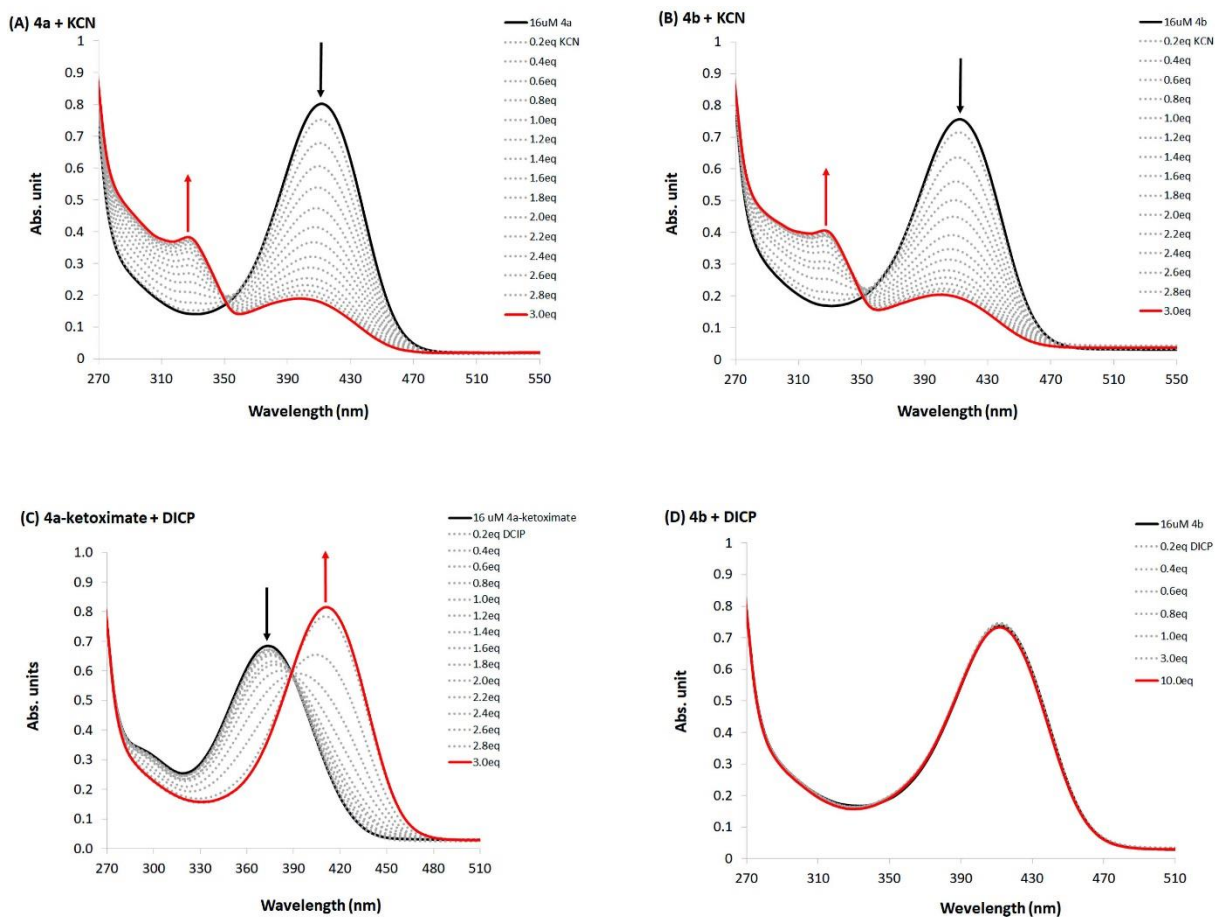

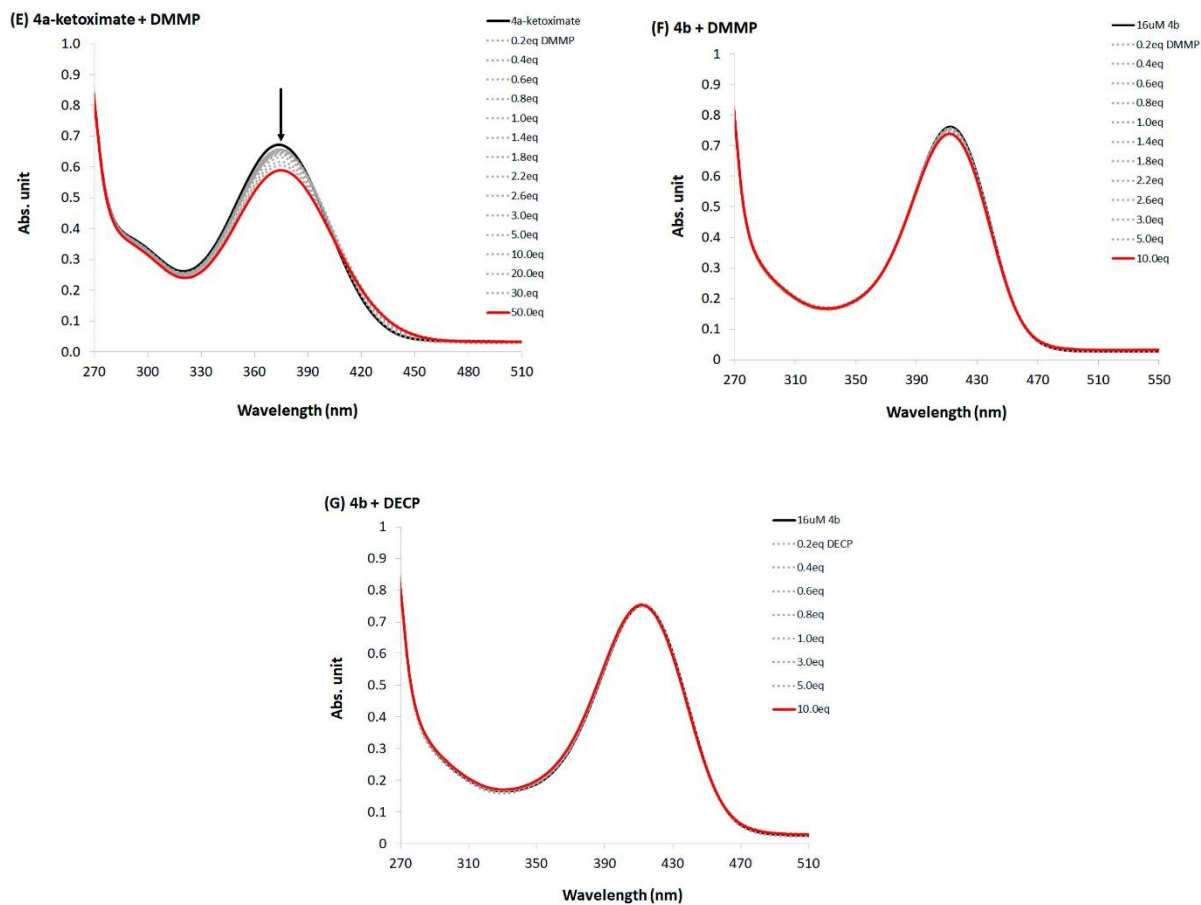

**Figure S18.** UV-Vis titration spectra of **4a** and model compound **4b** ( $16 \mu\text{mol}\cdot\text{dm}^{-3}$ , DMSO, 298 K): addition of KCN to **4a** (A) and **4b** (B); addition of aliquots of DICP to **4a** ketoximate (C) and **4b** (D), addition of DMMP to **4a** ketoximate (E) and **4b** (F) and addition of DECP to **4b** (G).

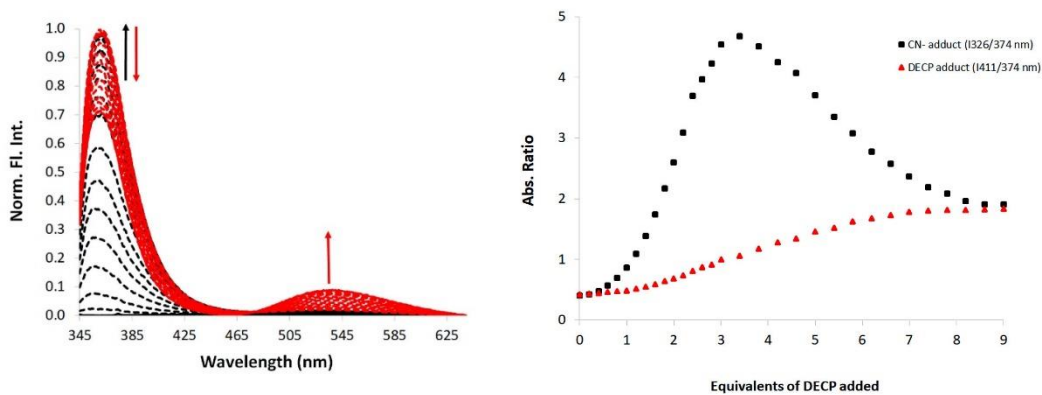

**Figure S19.** Left, Fluorescence titration of **4a**-ketoximate ( $16 \mu\text{mol}\cdot\text{dm}^{-3}$ , DMSO, 298 K) upon the addition of aliquots of DECP; Right, binding isotherm.

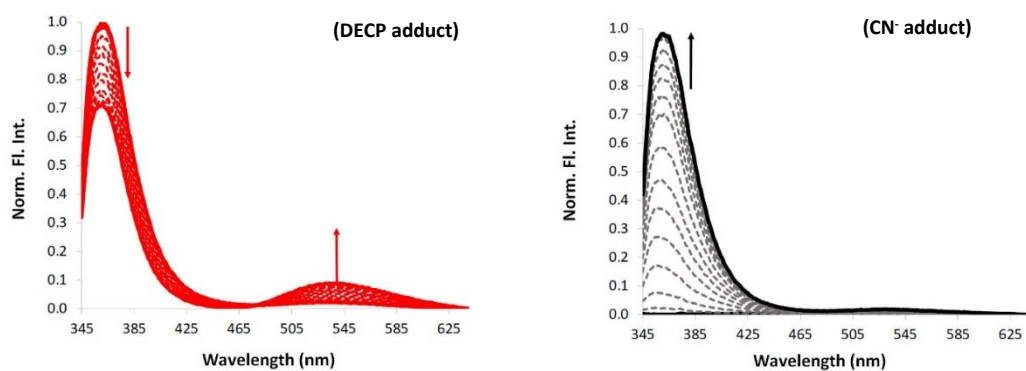

**Figure S20.** Fluorescence titration of **4a**-ketoximate ( $16 \mu\text{mol}\cdot\text{dm}^{-3}$ , DMSO, 298 K) upon the addition of DECP showing the two different species –phosphorylation adduct (left) and  $\text{CN}^-$  adduct (right).

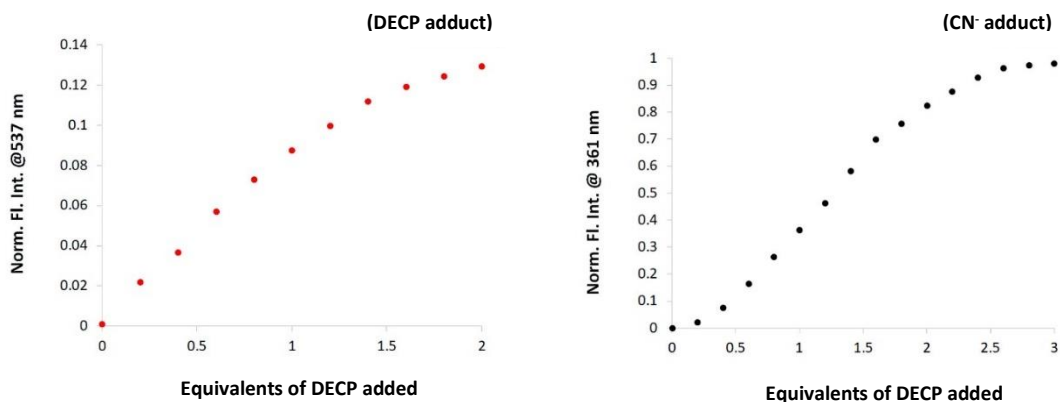

**Figure S21.** Fluorescence binding isotherms of **4a**-ketoximate ( $16 \mu\text{mol}\cdot\text{dm}^{-3}$ , DMSO, 298 K) upon the addition of aliquots of DECP lower concentration range 0-3 equivalents. Phosphorylation adduct (left) and  $\text{CN}^-$  adduct (right).

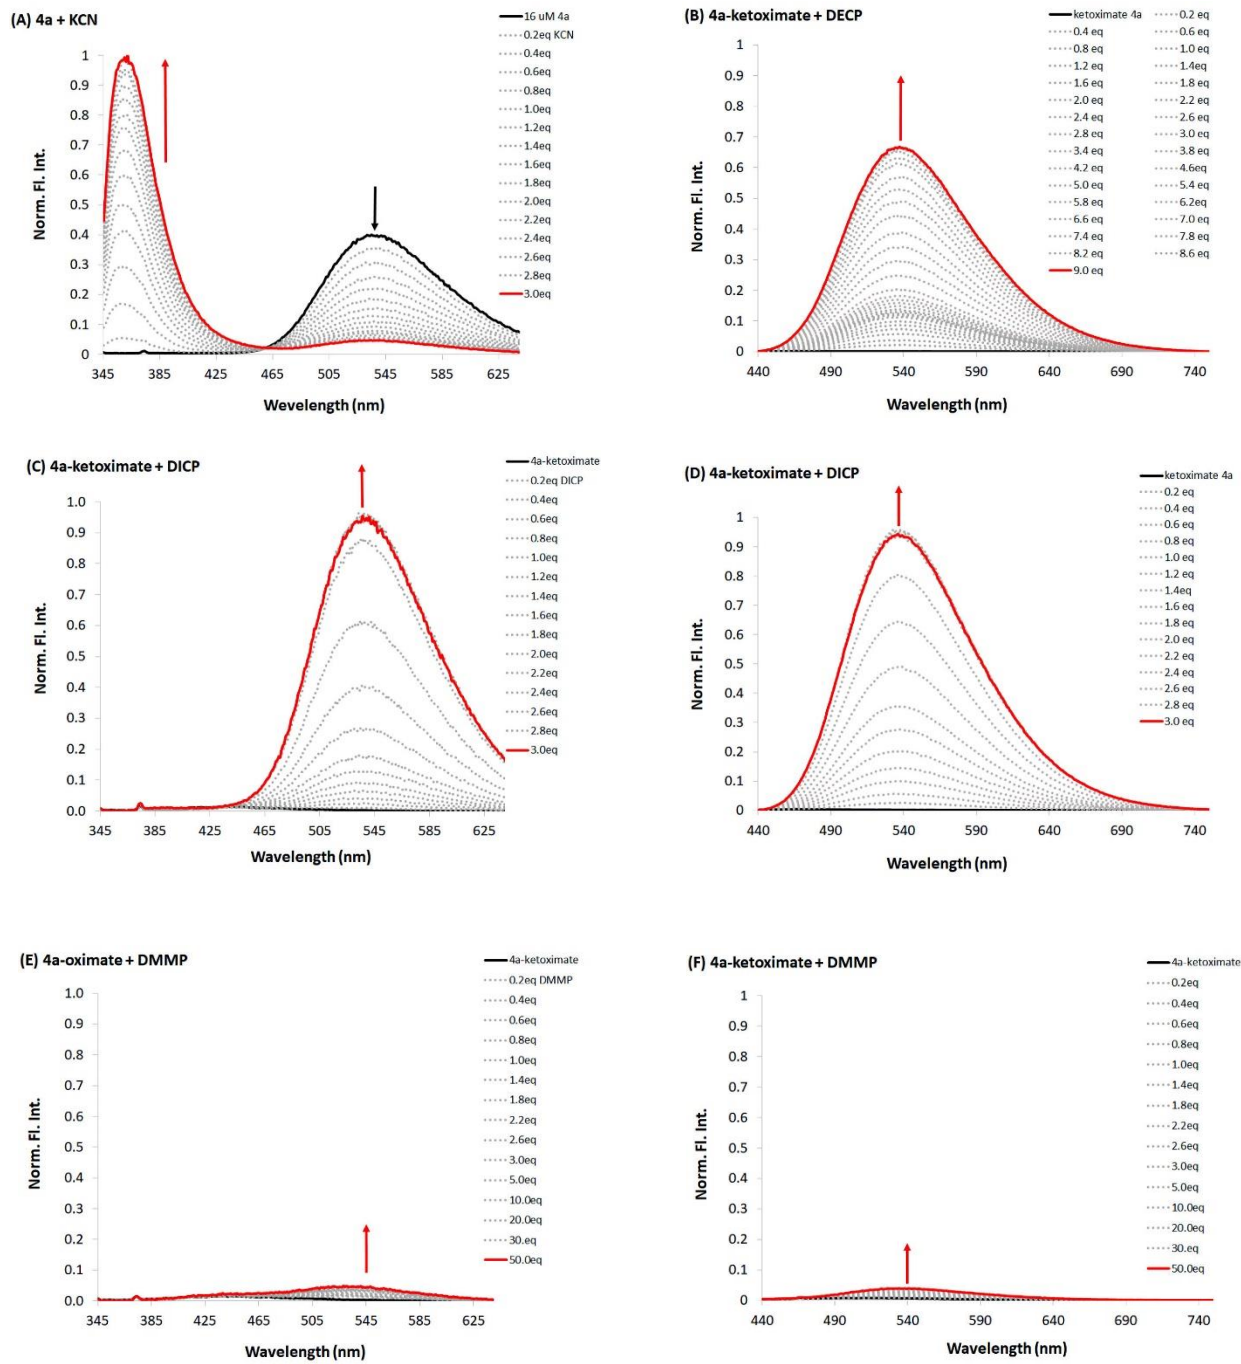

**Figure S22.** Steady-state fluorescence titration of **4a** (16  $\mu\text{mol}\cdot\text{dm}^{-3}$ , DMSO, 298 K). Excited at 336 nm (Black; A, C & E) and excited at 410 nm (Gray; B, D & F).

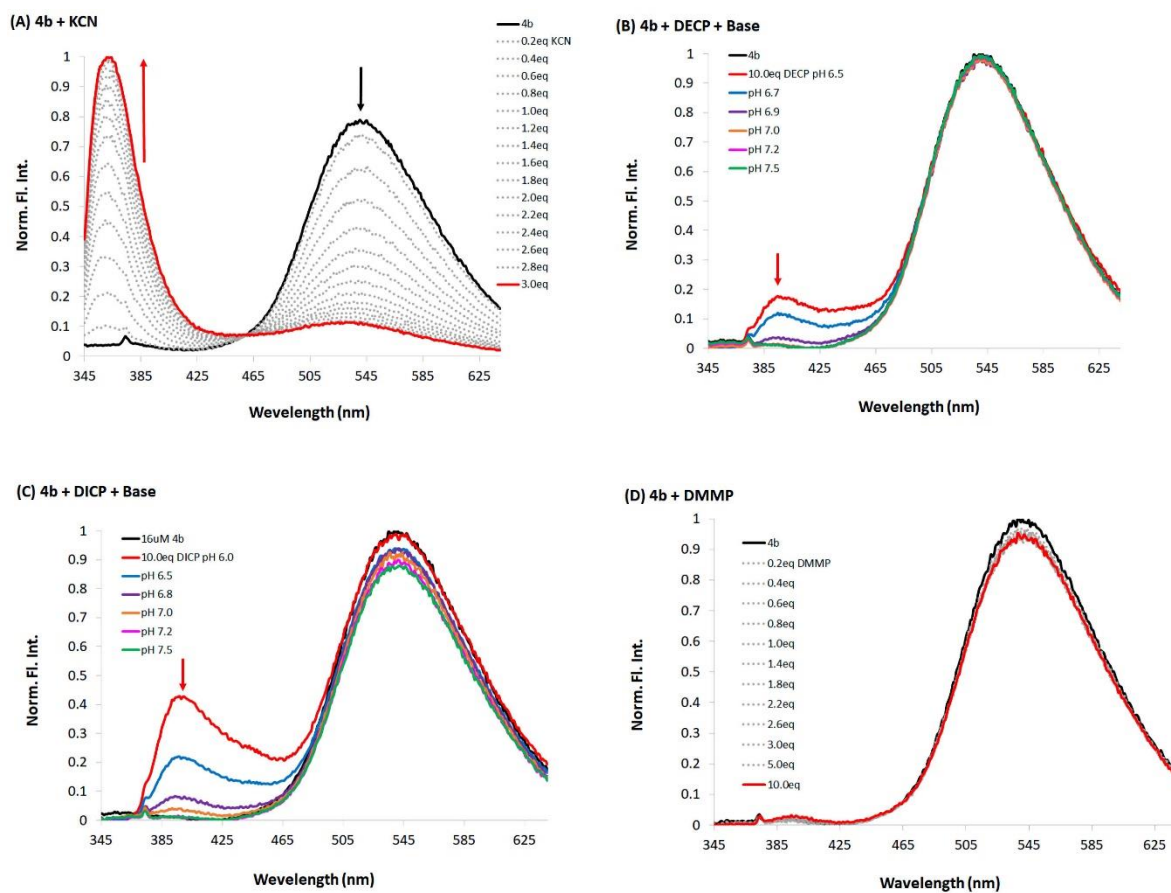

**Figure S23.** Steady-state fluorescence titration of of **4b** ( $16 \mu\text{mol}\cdot\text{dm}^{-3}$   $\lambda_{\text{ex}} = 336 \text{ nm}$ , DMSO, 298 K). (B & C) ten equivalence base ( $\text{P}_4\text{-}t\text{-Bu}$ ) added to ‘mop up’ excess acid.



## 4. Fluorescence Lifetime of 4a, 4a-oximate and adducts and model systems

Lifetime fluorescence was performed using 300 nm NanoLED LESER light source with emission set to 540 nm.

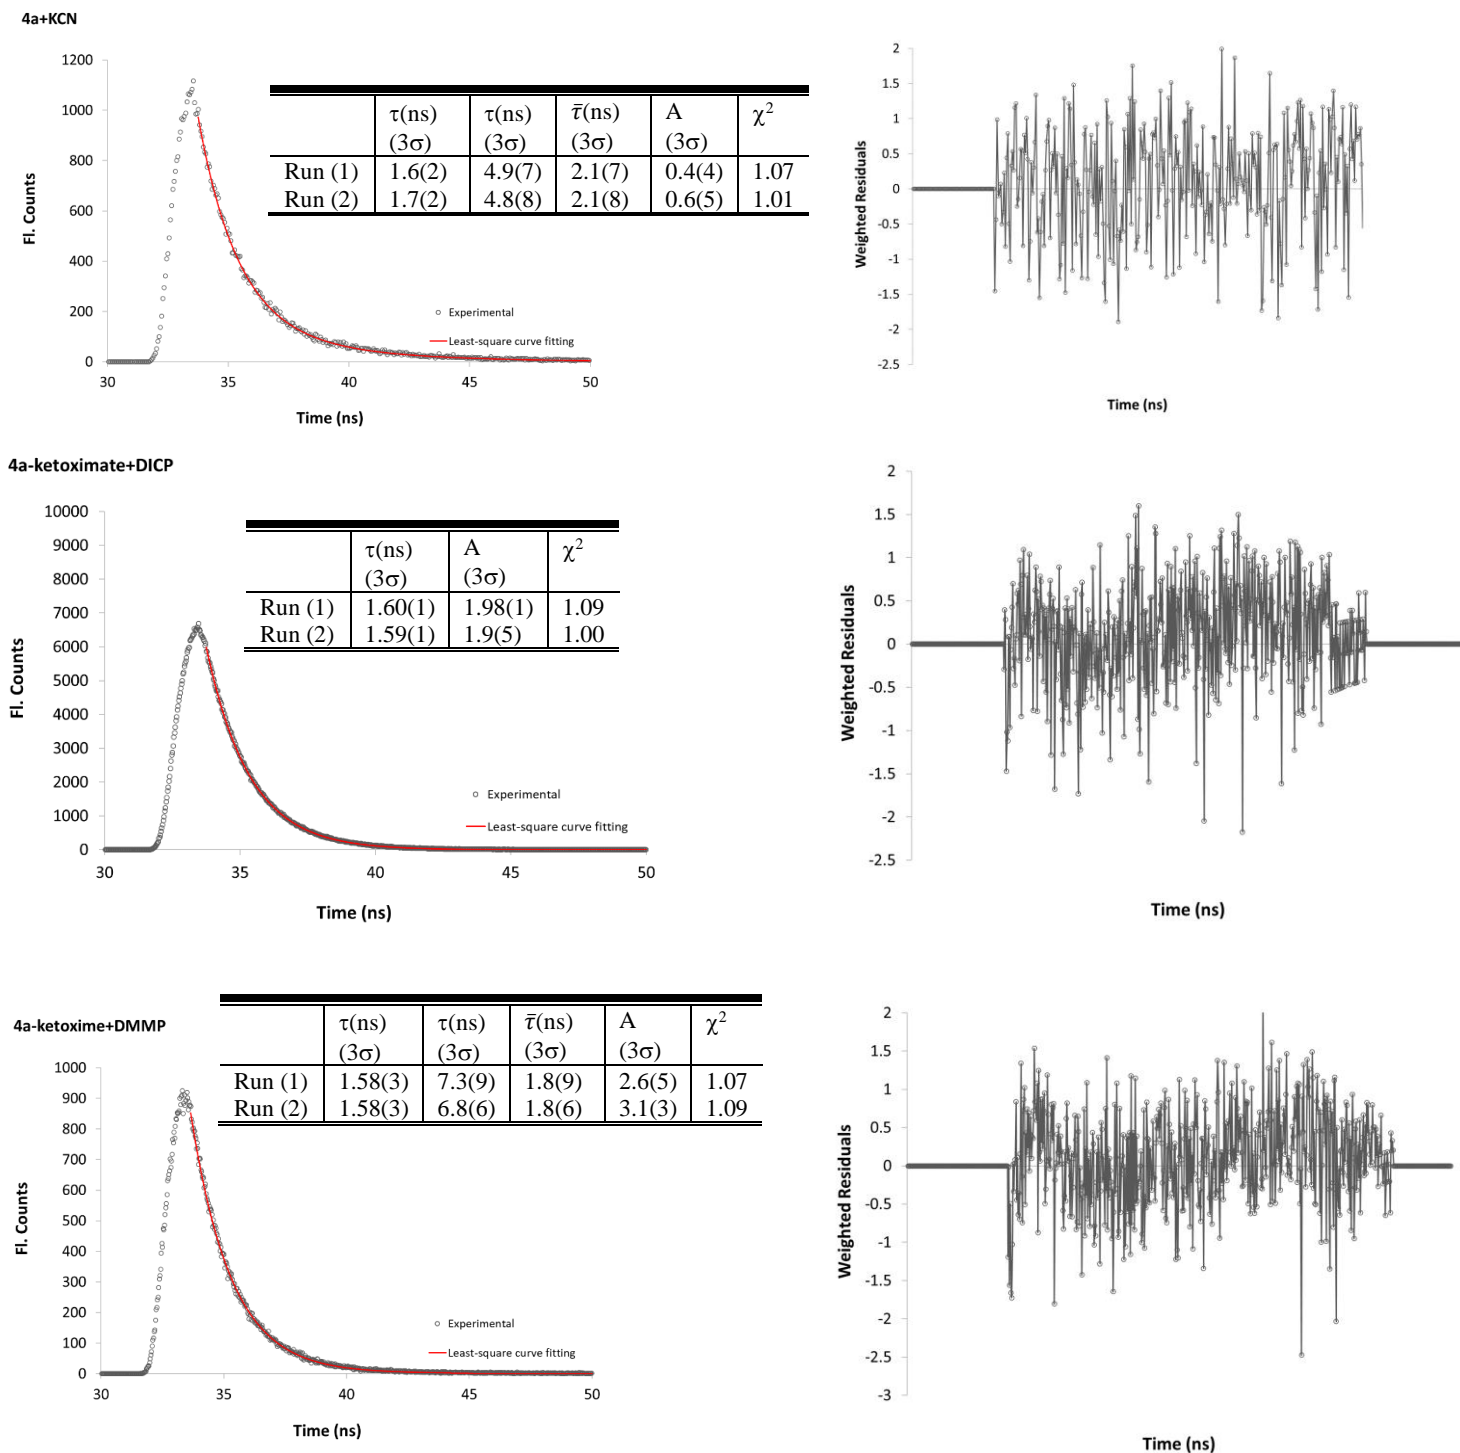

**Figure S24.** The fluorescence lifetime of **4a**-ketoxime, **4a**-ketoximate ( $16 \mu\text{mol}\cdot\text{dm}^{-3}$ , DMSO,  $\lambda_{\text{em}} = 540 \text{ nm}$ , 298 K) and upon the addition of KCN, DICP, DMMP. LESER 300 nm light source.



4b

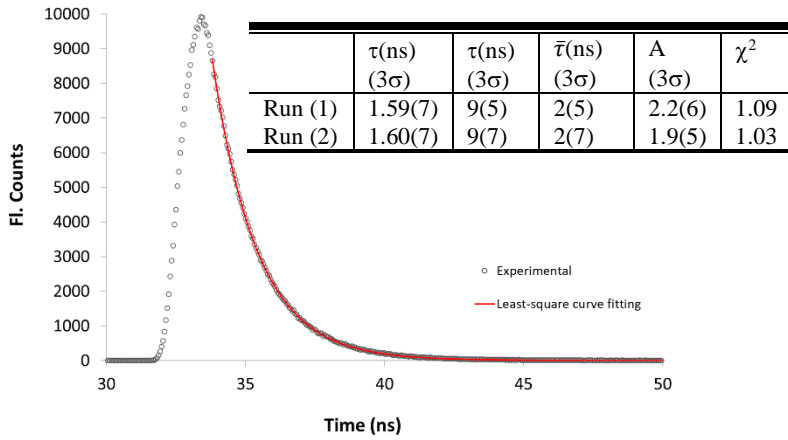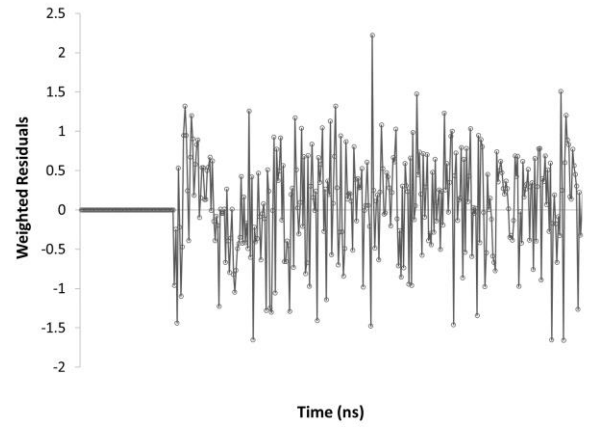

4b + DECP

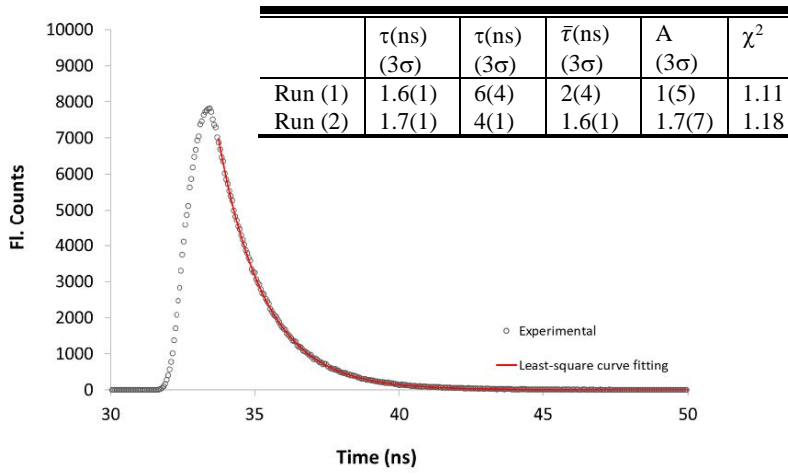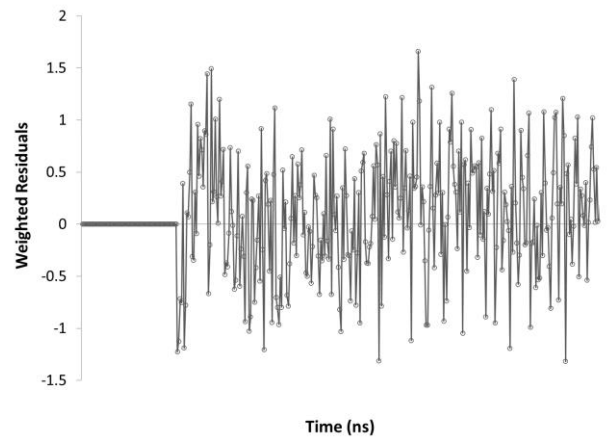

4b+KCN

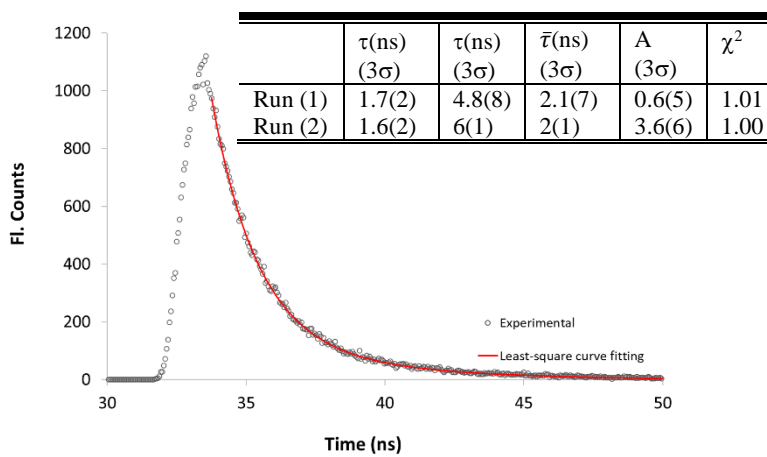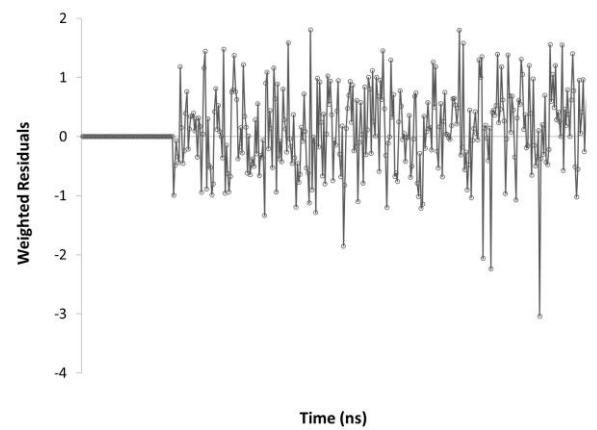

**4b+DICP**
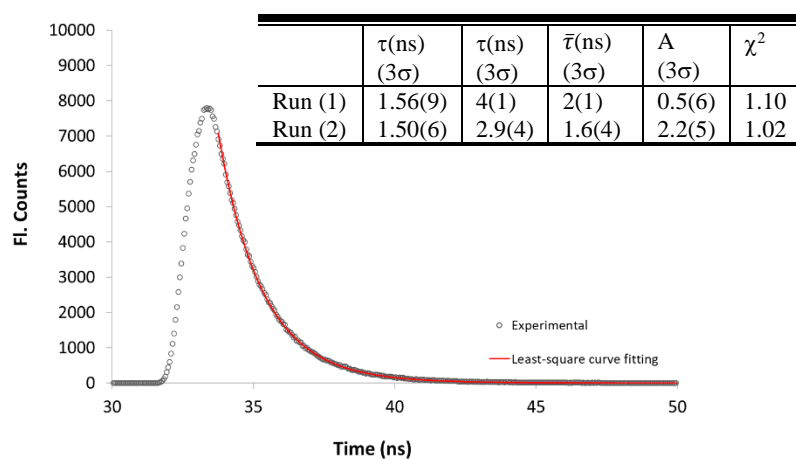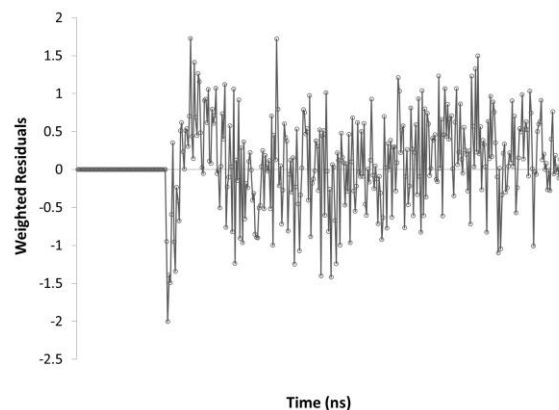

Time (ns)

**4b+DMMP**
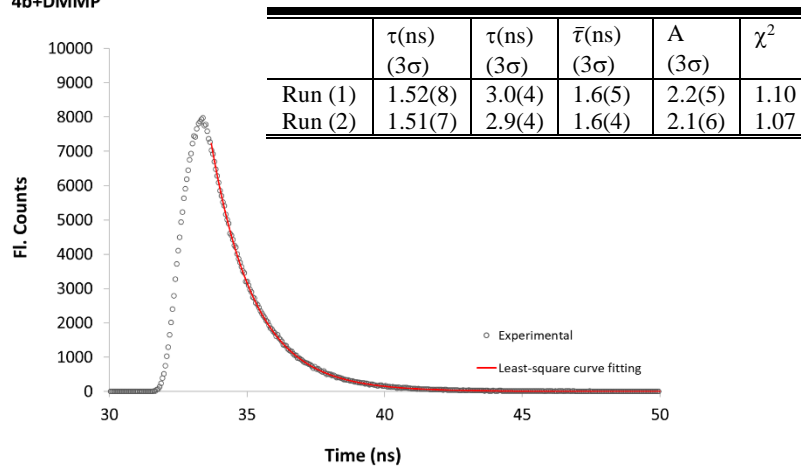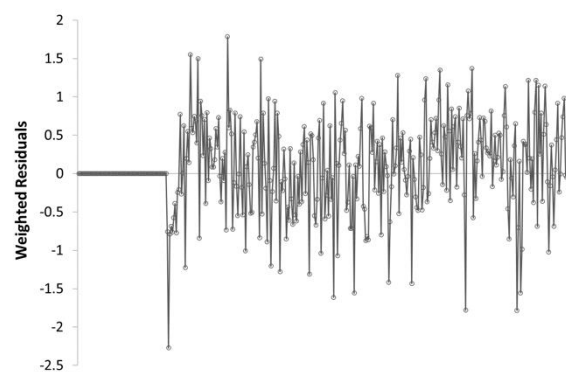

Time (ns)

**Figure S25.** Fluorescence lifetime of **4b** ( $16 \mu\text{mol}\cdot\text{dm}^{-3}$ , DMSO,  $\lambda_{\text{em}} = 540 \text{ nm}$ , 298 K) and upon the addition of DECP, KCN, DICP, DMMP using 300 nm LESER light source.

**Table S3.** Fluorescence lifetimes ( $\tau$ ) of various reactive species (average of best two run).

|                                    | $\tau_1$ (ns)<br>(3 $\sigma$ ) | $\tau_2$ (ns)<br>(3 $\sigma$ ) | $\bar{\tau}$ (ns)<br>(3 $\sigma$ ) | A<br>(3 $\sigma$ ) | $\chi^2$ |
|------------------------------------|--------------------------------|--------------------------------|------------------------------------|--------------------|----------|
| <b>4a</b>                          | 1.61 (1)                       | N/A                            | 1.61 (1)                           | 2.8 (6)            | 1.07     |
| <b>4a-oximate</b>                  | 0.9 (2)                        | 6.2 (5)                        | 2.3 (5)                            | 3.8 (4)            | 1.12     |
| Diethyl phosphorocyanidate (DECP)  | 1.6(2)                         | 9 (1)                          | 2 (1)                              | 1.2 (4)            | 1.09     |
| KCN                                | 1.7 (2)                        | 4.9 ( $\pm$ 7)                 | 2.1 (7)                            | 0.5 (5)            | 1.06     |
| Diisopropyl chlorophosphite (DICP) | 1.60 (1)                       | N/A                            | 1.60 (1)                           | 2.0 (2)            | 1.05     |
| Dimethyl methylphosphonate (DMMP)  | 1.59 (3)                       | 7.1 (8)                        | 1.8 (8)                            | 2.8 (4)            | 1.08     |
| <b>4b</b>                          | 1.60 (7)                       | 9 (6)                          | 2 (6)                              | 2.0 (5)            | 1.06     |
| DECP                               | 1.6 (1)                        | 5 (2)                          | 2 (2)                              | 0.9 (6)            | 1.15     |
| KCN                                | 1.7 (2)                        | 5 (1)                          | 2 (1)                              | 2.1 (6)            | 1.01     |
| DICP                               | 1.53 (8)                       | 3.6 (8)                        | 1.6 (8)                            | 1.4 (6)            | 1.06     |
| DMMP                               | 1.52 (8)                       | 2.9 (4)                        | 1.6 (4)                            | 2.2 (5)            | 1.09     |

## 5. 1D and 2D NMR spectra for 4a plus KCN

**Table S4.**  $^1\text{H}$  and  $^{13}\text{C}$  NMR assignment for **4a** in  $\text{DMSO-}d_6$ , 298 K.

|            | $^1\text{H}$ NMR<br>(ppm, $J$ = Hz)                 | $^{13}\text{C}$ NMR<br>(ppm) |
|------------|-----------------------------------------------------|------------------------------|
| 2          | NA                                                  | 163.6                        |
| 3          | NA                                                  | 88.4                         |
| 4          | NA                                                  | 173.2                        |
| 4a         | NA                                                  | 150.0                        |
| 5          | 7.56 (d, $J$ = 8.8, 1H)                             | 125.5                        |
| 6          | 6.48 (dd, $J$ = 8.9, 2.5, 1H)                       | 106.8                        |
| 7          | NA                                                  | 111.2                        |
| 8          | 6.21 (d, $J$ = 2.4, 1H)                             | 96.4                         |
| 8a         | NA                                                  | 155.6                        |
| 9          | 5.63 (d, $J$ = 9.6, 1H)                             | 40.6                         |
| 10         | NA                                                  | 146.9                        |
| 11/11'     | 6.74 (d, $J$ = 8.9 2H)                              | 113.0                        |
| 12/12'     | 7.46 (d, $J$ = 8.8, 2H)                             | 126.4                        |
| 13         | NA                                                  | 126.2                        |
| 14         | NA                                                  | 152.6                        |
| 15         | 2.07 (s, 3H)                                        | 11.2                         |
| 16         | 3.25 (t, $J$ = 7.7, 4H)                             | 51.9                         |
| 17         | 1.54 (h, $J$ = 7.39, 7.39, 7.32,<br>7.32, 7.32, 4H) | 20.0                         |
| 18         | 0.89 (t, $J$ = 7.4, 6H)                             | 11.1                         |
| OH (oxime) | 10.76 (br s, 1H)                                    | NA                           |
| NH         | 6.38 (d, $J$ = 9.8, 1H)                             | NA                           |
| CN         | NA                                                  | 120.6                        |

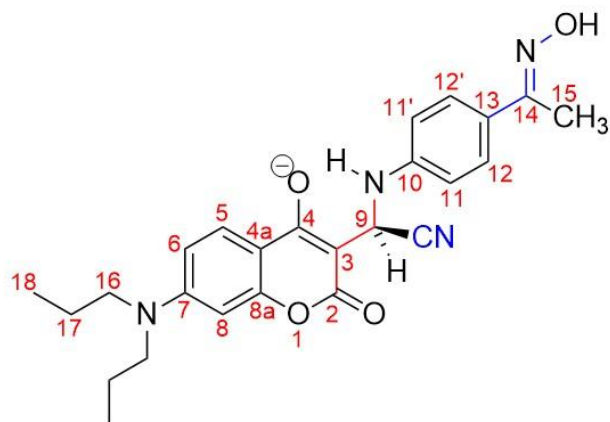

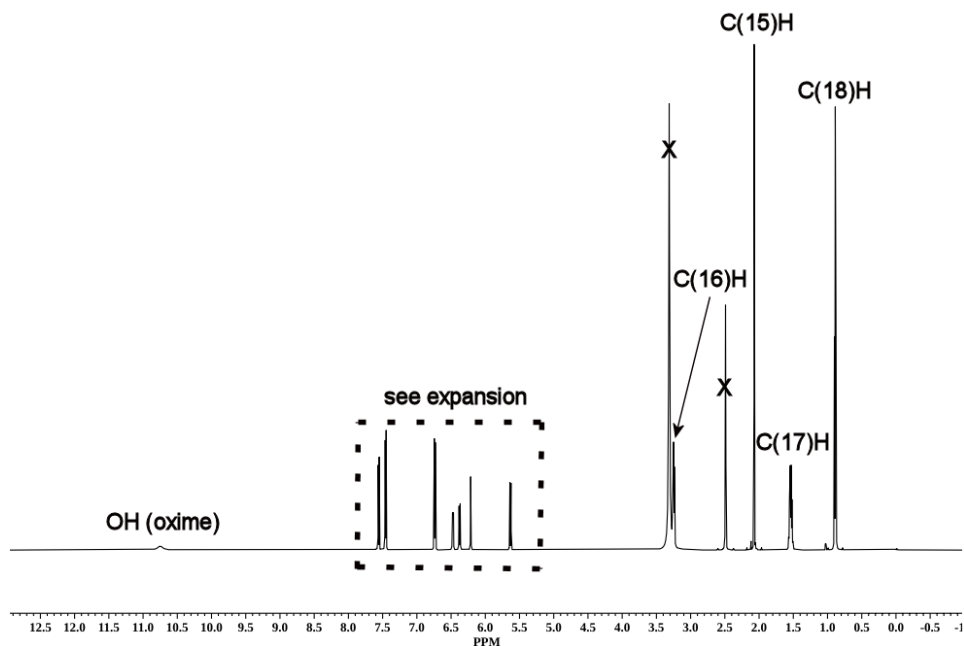

**Figure S26.**  $^1\text{H-NMR}$  spectrum of **4a** plus two equivalence KCN in  $\text{DMSO-}d_6$  at 298 K.

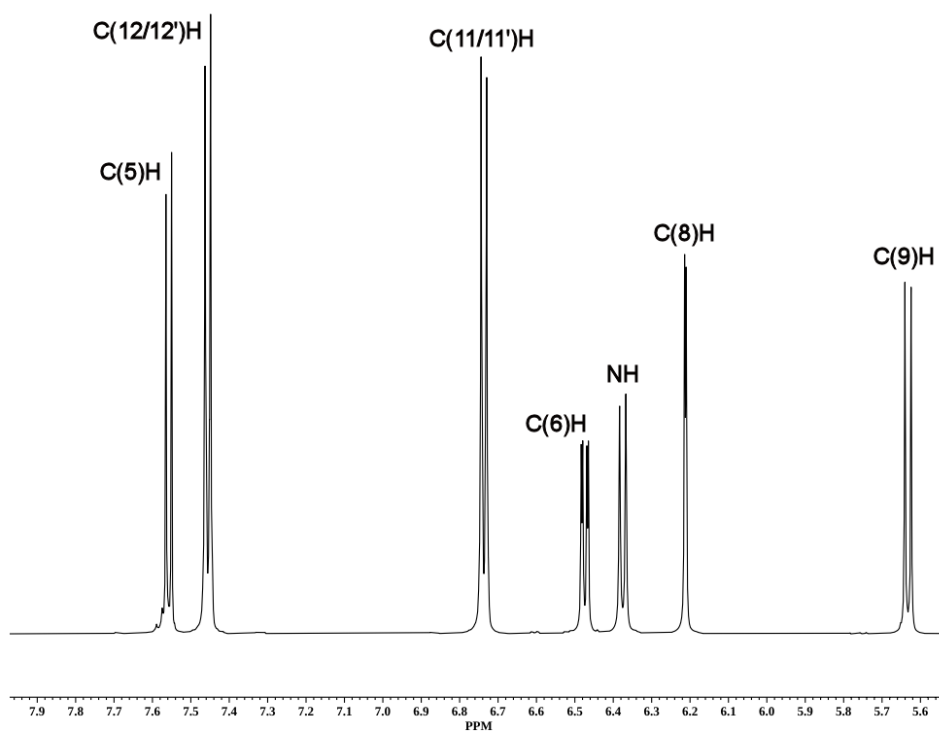

**Figure S27.**  $^1\text{H-NMR}$  spectrum (expansion-aromatic region) of **4a** plus two equivalence KCN in  $\text{DMSO-}d_6$  at 298 K.

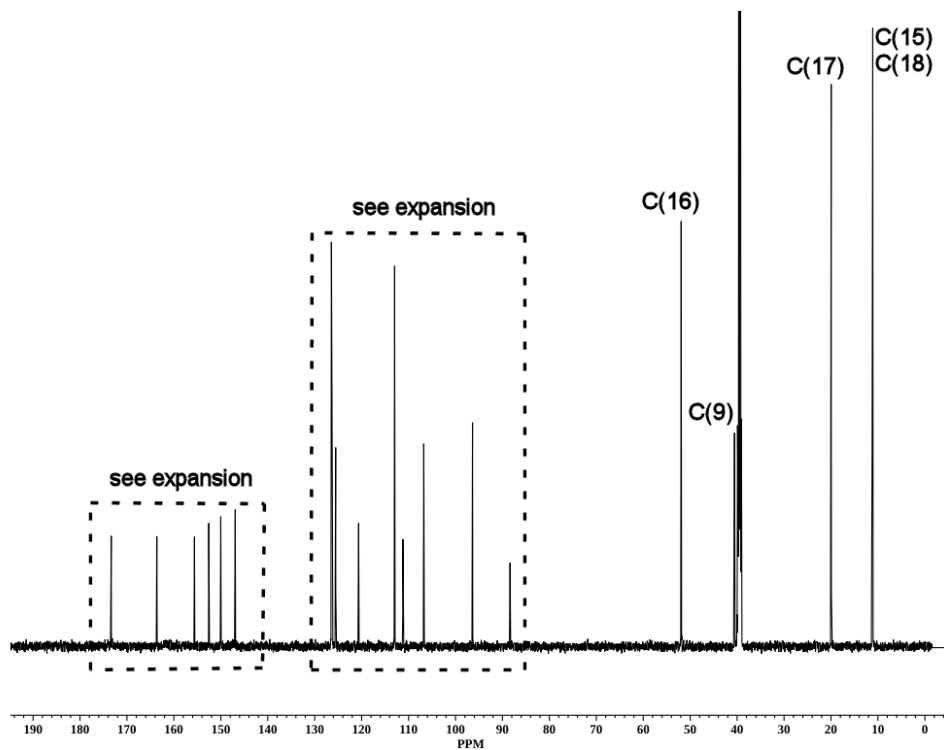

**Figure S28.**  $^{13}\text{C}$ -NMR spectrum of **4a** plus two equivalence KCN in  $\text{DMSO-}d_6$  at 298 K.

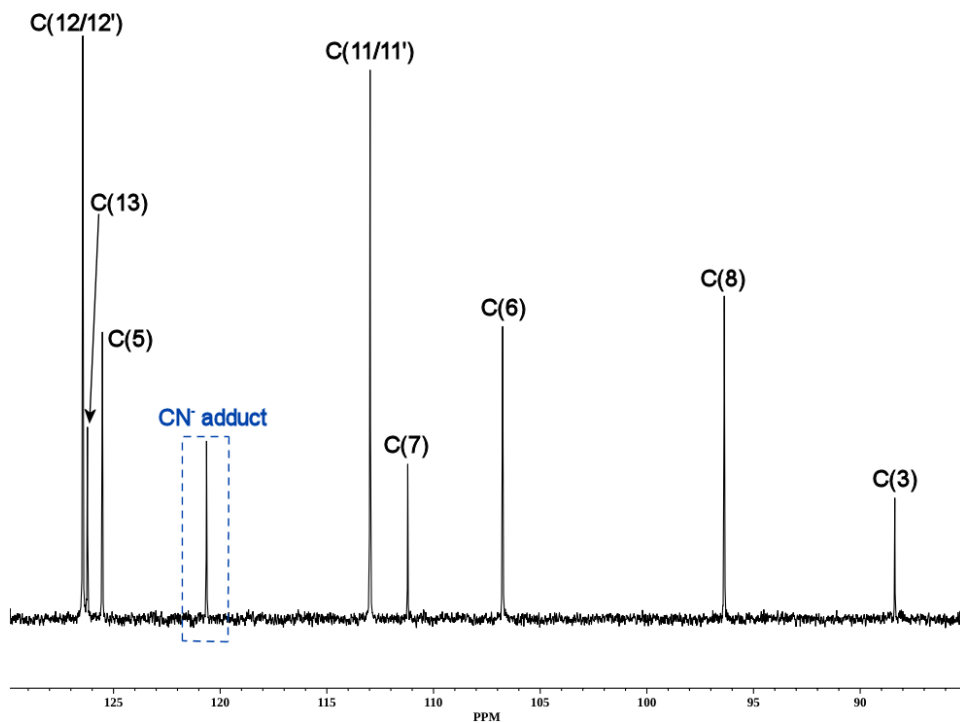

**Figure S29.**  $^{13}\text{C}$ -NMR spectrum (expansion 85 to 130 ppm) of **4a** plus two equivalence KCN in  $\text{DMSO-}d_6$  at 298 K.

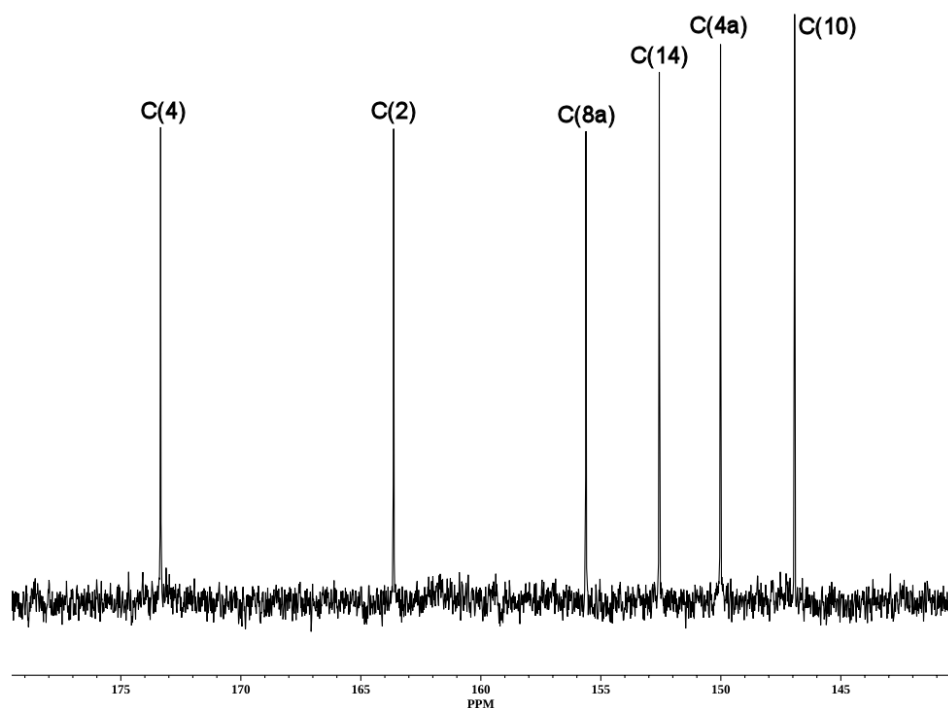

**Figure S30.**  $^{13}\text{C}$ -NMR spectrum (expansion 140 to 180 ppm) of **4a** plus two equivalence KCN in  $\text{DMSO-}d_6$  at 298 K.

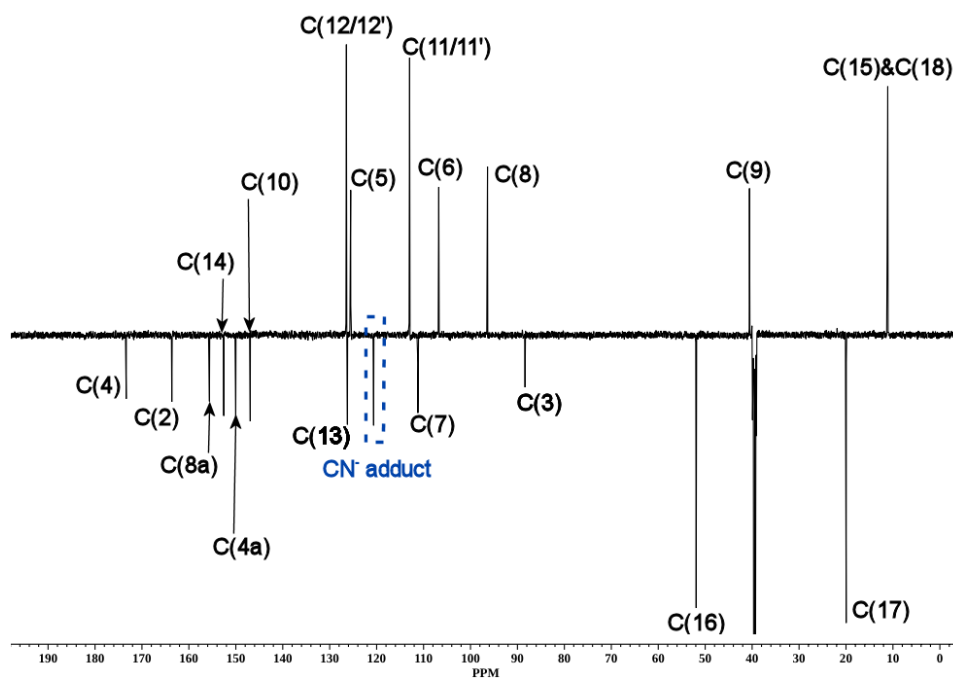

**Figure S31.**  $^{13}\text{C}$ -APT NMR spectrum of **4a** plus two equivalence KCN in  $\text{DMSO-}d_6$  at 298 K.

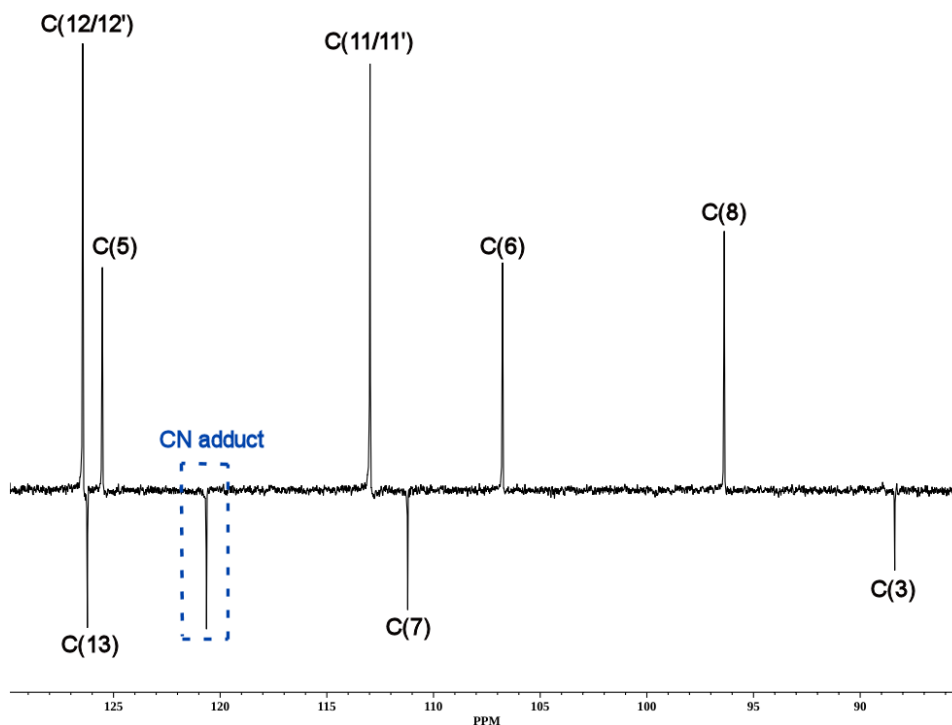

**Figure S32.**  $^{13}\text{C}$ -APT NMR spectrum (expansion 80 to 130 ppm) of **4a** plus two equivalence KCN in  $\text{DMSO-}d_6$  at 298 K.

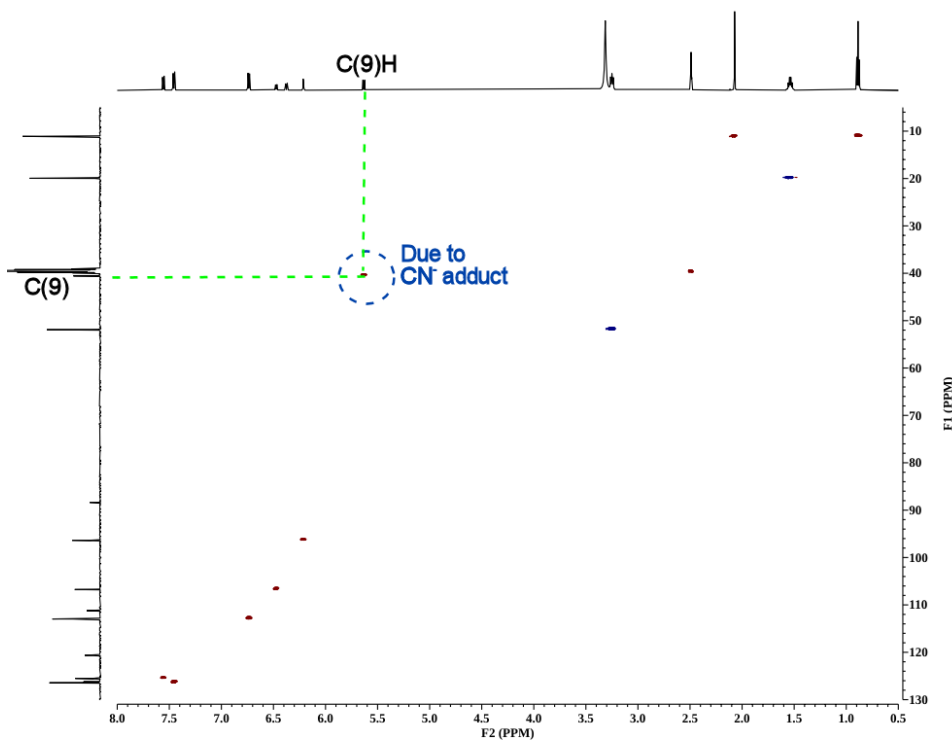

**Figure S33.** HSQC spectrum (full spectrum) of **4a** plus two equivalence KCN in  $\text{DMSO-}d_6$  at 298 K.

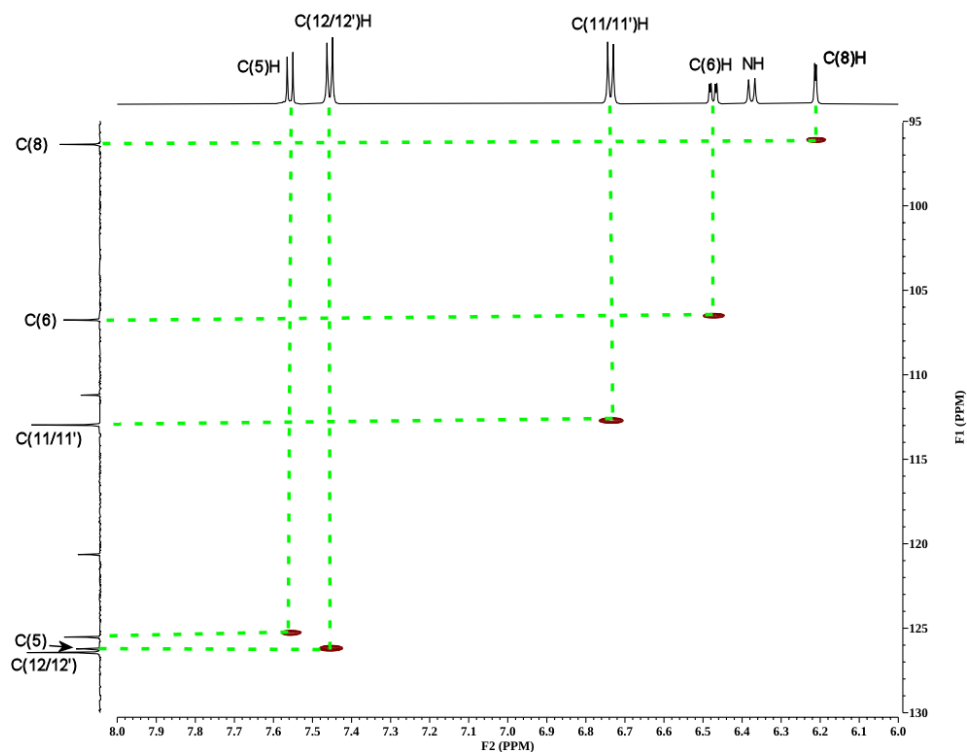

**Figure S34.** HSQC spectrum (expansion aromatic region) of **4a** plus two equivalence KCN in DMSO-*d*<sub>6</sub> at 298 K.

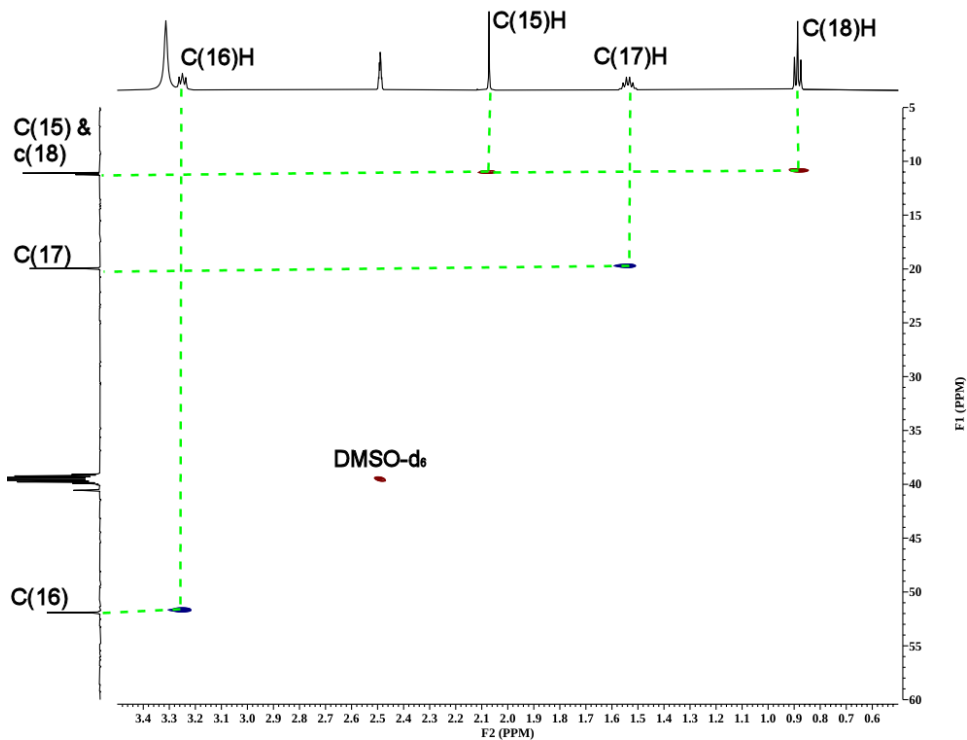

**Figure S35.** HSQC spectrum (expansion) of **4a** plus two equivalence KCN in DMSO-*d*<sub>6</sub> at 298 K.



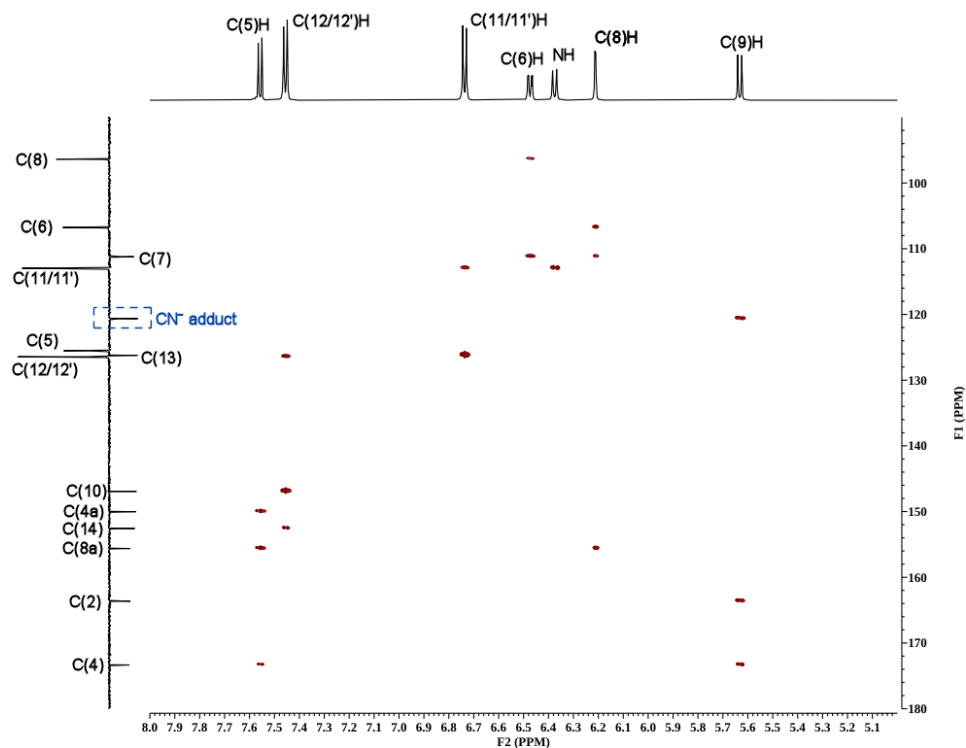

Figure S36. HMBC spectrum (expansion) of **4a** plus two equivalence KCN in DMSO- $d_6$  at 298 .

## 6. In situ NMR Experiments; **4a** plus DECP

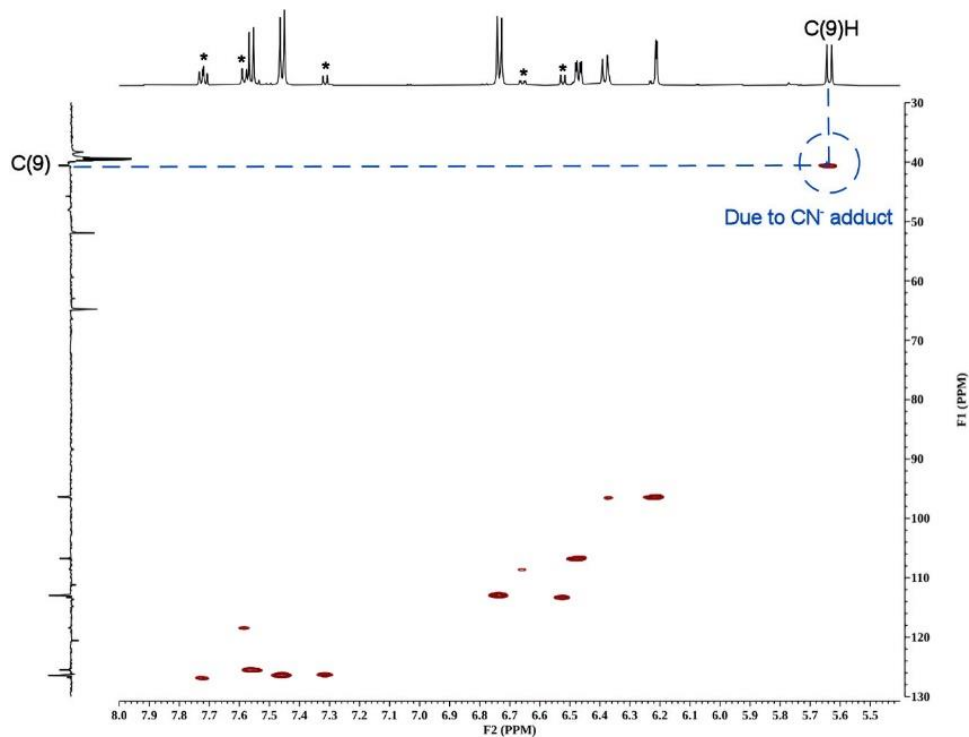

Figure S37. HSQC spectrum (expansion) of **4a** plus Hünig's base plus three equivalence DECP in DMSO- $d_6$  at 298 K (\*) are degraded products.

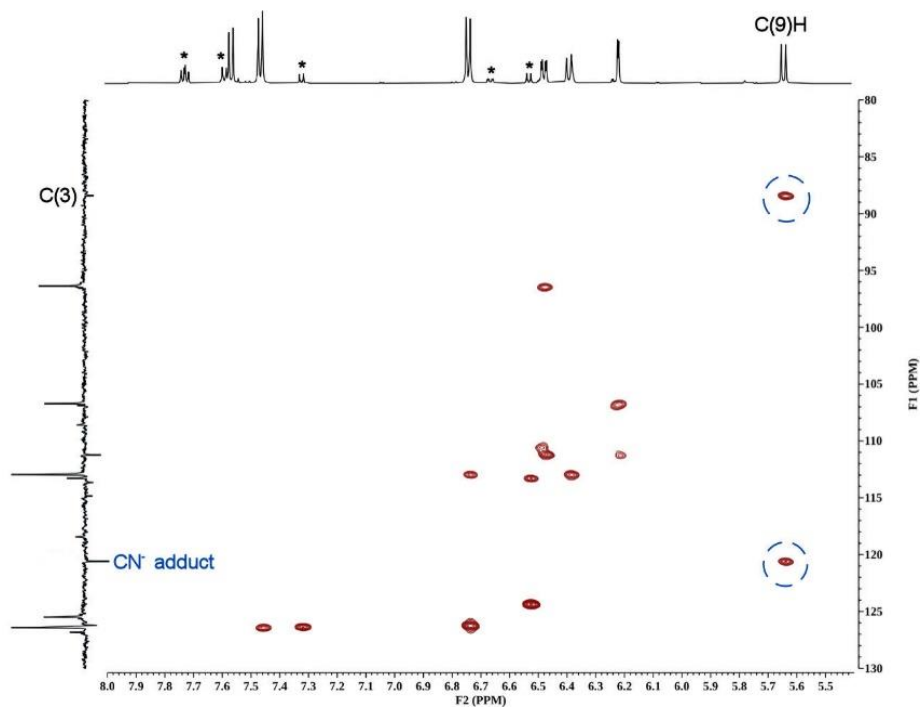

**Figure S38.** HMBC spectrum (expansion) of **4a** plus Hünig's base plus three equivalence DECP in DMSO-*d*<sub>6</sub> at 298 K (\*) are degraded products.

## 7. Mass Spectrometry of **4a** plus DECP

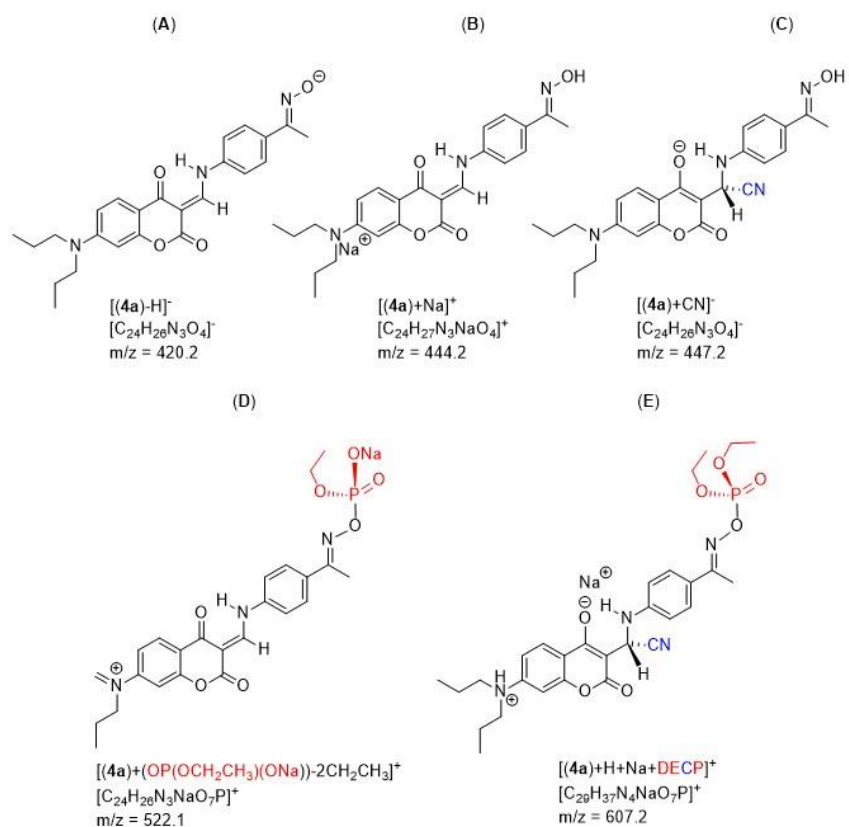

**Figure S39.** Possible structures assigned to the mass spectrometry signals (negative and positive mode).

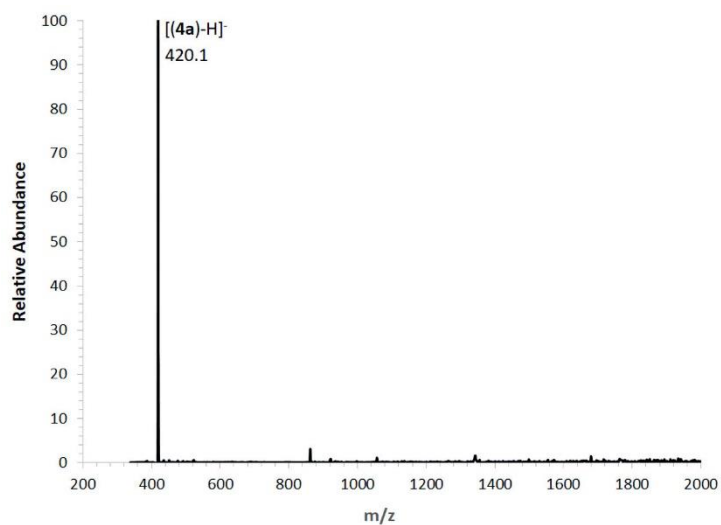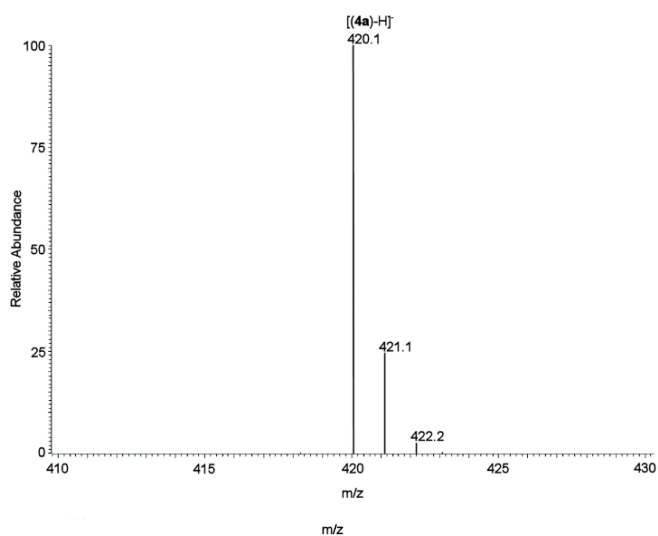

**Figure S40.** ESI-MS; free **4a** (negative mode) LHS: full spectrum.

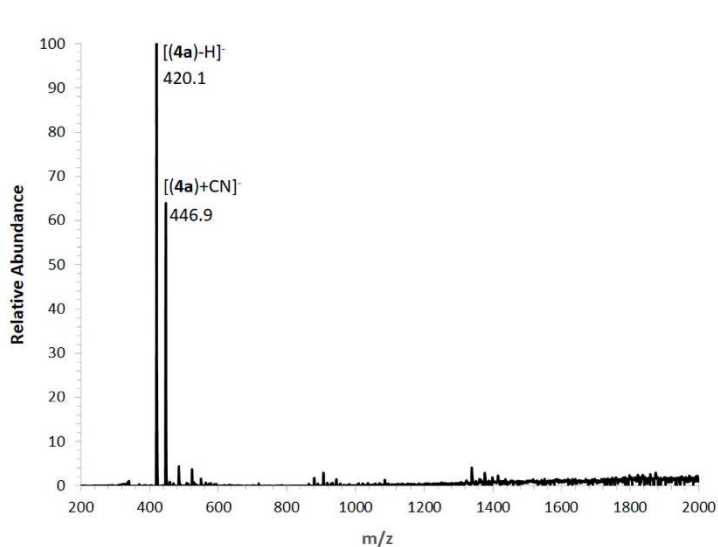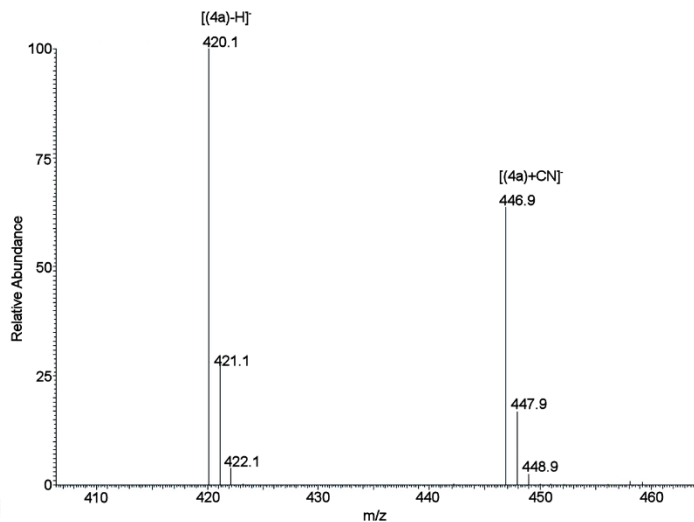

**Figure S41.** ESI-MS; **4a-CN<sup>-</sup>** adduct upon the addition of two equivalence KCN (negative mode); The free **4a** also can be seen at 298K. LHS: full spectrum.

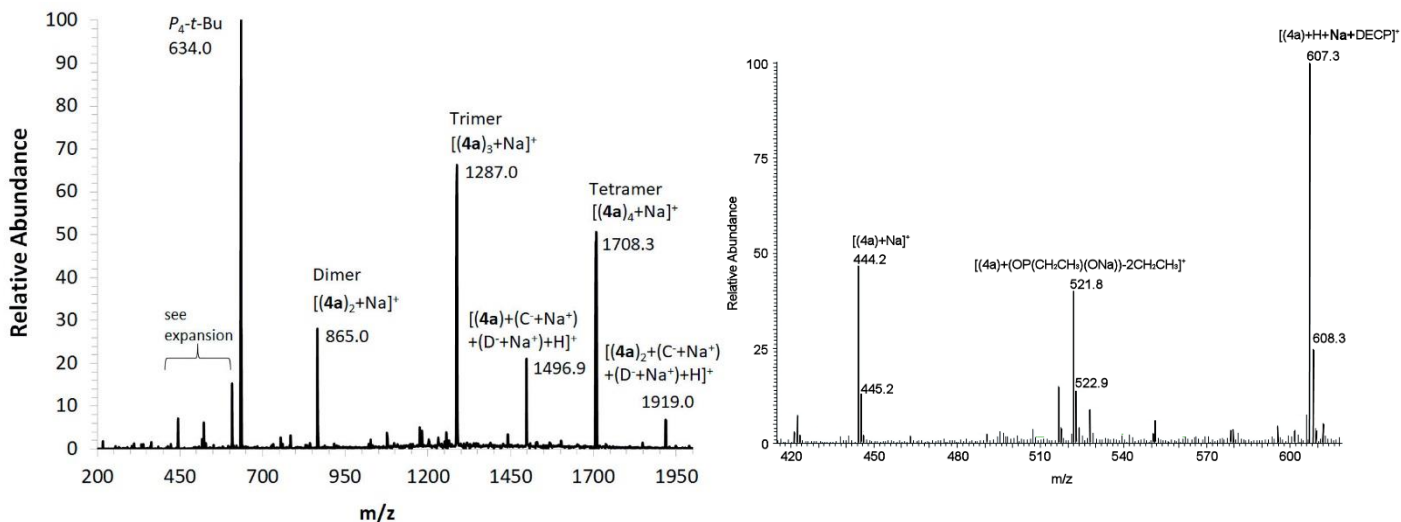

**Figure S42.** Left: ESI-MS; **4a-DECP** adduct (positive mode); upon the addition of  $P_4$ -*t*-Bu and DECP (dimers, trimers, and tetramers of **4a** and proposed species are shown in figure S39) are identifiable. Right: To improve the relative abundance of the adducts, we re-run the ESI-MS experiments between  $m/z$  200 and 600. The MS shows three distinct species are identified **4a**, species (D-fig. S39) and the desired bis-adduct (species E-fig S39), at 298 K.

## 8. Molecular Modelling

Computational details reported in the manuscript.

|                      |                  |
|----------------------|------------------|
| tabun mimic          | -818.081328 au   |
| ketoximate           | -1394.551554 au  |
| (total for reactants | -2212.632882 au) |
| transition state 1   | -2212.496011 au  |
| transition state 2   | -2212.583400 au  |
| product              | -2212.701827 au  |

$$\Delta E_{(\text{reactants} \rightarrow \text{TS1})} = 0.136871 \text{ au (+359.29 kJmol}^{-1}\text{)}$$

$$\Delta E_{(\text{TS1} \rightarrow \text{TS2})} = -0.0873789 \text{ au (-229.37 kJmol}^{-1}\text{)}$$

$$\Delta E_{(\text{TS2} \rightarrow \text{product})} = -0.118427 \text{ au (-310.87 kJmol}^{-1}\text{)}$$

$$\Delta E_{(\text{reactants} \rightarrow \text{product})} = -0.068945 \text{ au (-180.95 kJmol}^{-1}\text{)}$$

## 9. Limit of Detection

The LOD was determined by least square linear regression. Confidence limit of the slope is defined as  $b \pm t_{sb}$  where  $t$  is the  $t$  value obtained from 95% confidence level ( $n = 12$ ;  $t = 1.782$ ). It is accepted that the LOD is the analyte concentration giving a signal equal to that of the blank signal plus three standard deviations from the blank ( $y = y_b + 3S_b$ ).

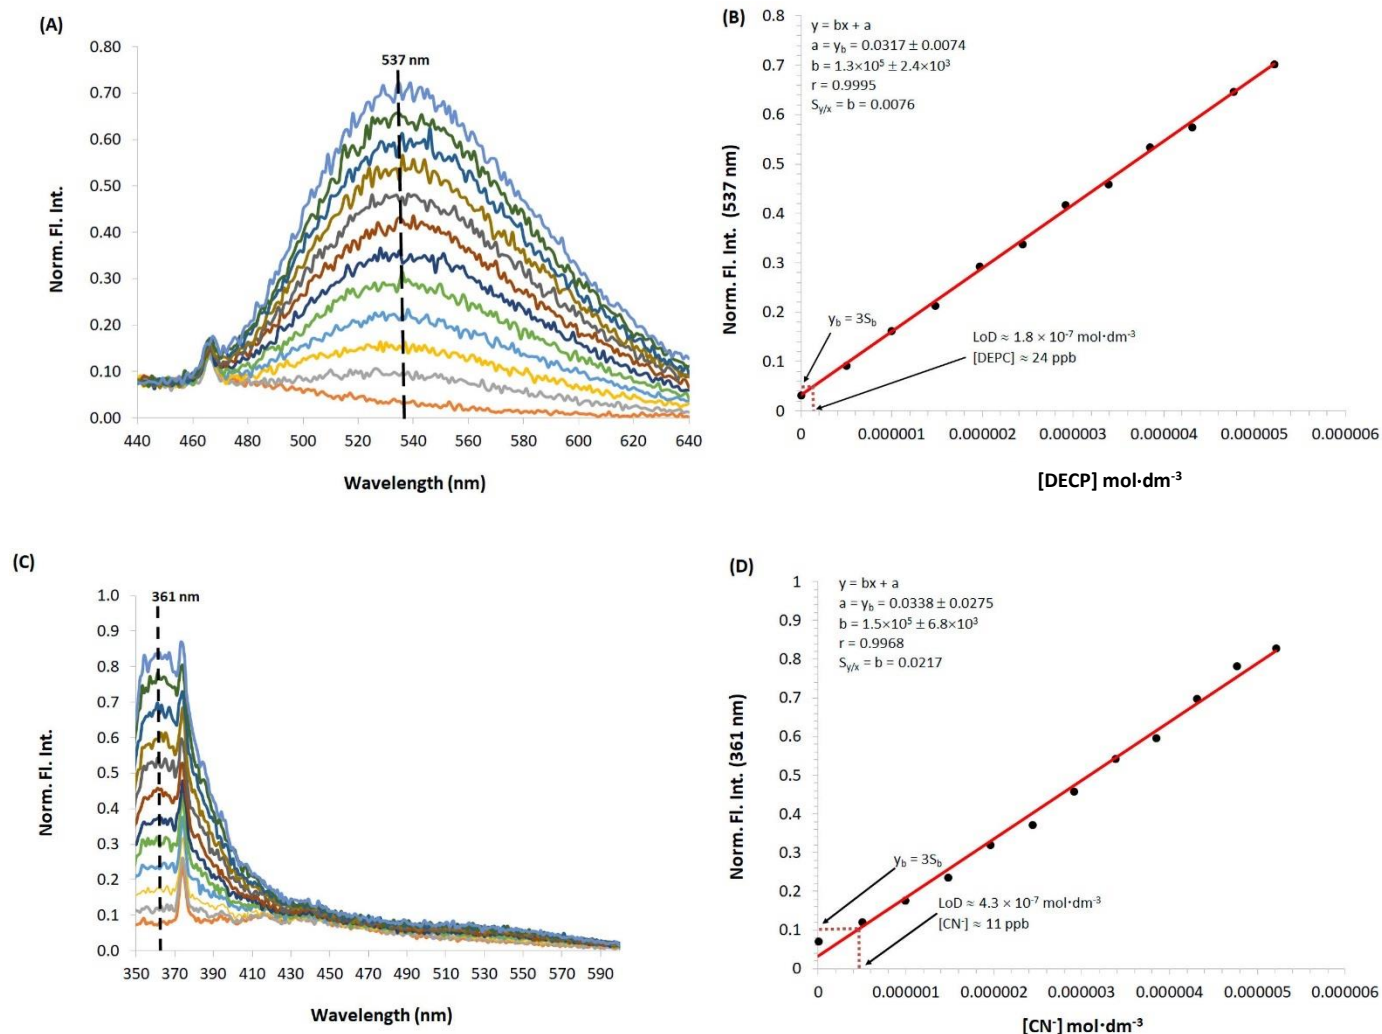

**Figure S43.** Limit of detection of Chemodosimeter **4a** on the addition of DECP (A) Normalized fluorescence spectra of **4a**-DECP adduct (B) Linear regression fit, (C) Normalized fluorescence graph of **4a**-cyanide adduct (D) Linear regression fit in DMSO (1.0  $\mu\text{M}$ ,  $\lambda_{\text{ex}} = 440 \text{ nm}$  and  $\lambda_{\text{ex}} = 336 \text{ nm}$  for (A) and (C), respectively at 298 K).

## 10.0 X-ray crystallographic Tables

### Computing details

Data collection: Bruker *APEX3*; cell refinement: Bruker *SAINT*; data reduction: Bruker *SAINT*; program(s) used to solve structure: *SHELXT* 2014/5 (Sheldrick, 2014); program(s) used to refine structure: *SHELXL2017/1* (Sheldrick, 2017).

### Compound 4a

#### Crystal data

$C_{24}H_{27}N_3O_4$   
 $M_r = 421.48$   
 Triclinic,  $P\bar{1}$   
 $a = 5.1039$  (3) Å  
 $b = 14.0847$  (8) Å  
 $c = 15.9717$  (9) Å  
 $\alpha = 69.320$  (4)°  
 $\beta = 87.965$  (5)°  
 $\gamma = 80.713$  (4)°  
 $V = 1059.81$  (11) Å<sup>3</sup>

$Z = 2$   
 $F(000) = 448$   
 $D_x = 1.321$  Mg m<sup>-3</sup>  
 Cu  $K\alpha$  radiation,  $\lambda = 1.54184$  Å  
 Cell parameters from 926 reflections  
 $\theta = 3.0$ – $58.1$ °  
 $\mu = 0.74$  mm<sup>-1</sup>  
 $T = 90$  K  
 Needle, yellow  
 $0.24 \times 0.03 \times 0.01$  mm

#### Data collection

Bruker Kappa APEX-II DUO  
 diffractometer  
 Radiation source:  $I\mu S$  microfocus  
 QUAZAR multilayer optics monochromator  
 $\varphi$  and  $\omega$  scans  
 Absorption correction: multi-scan  
*SADABS* (Krause *et al.*, 2015)  
 $T_{\min} = 0.714$ ,  $T_{\max} = 0.993$

9299 measured reflections  
 3045 independent reflections  
 1468 reflections with  $I > 2\sigma(I)$   
 $R_{\text{int}} = 0.120$   
 $\theta_{\max} = 59.0$ °,  $\theta_{\min} = 3.0$ °  
 $h = -5 \rightarrow 5$   
 $k = -15 \rightarrow 15$   
 $l = -17 \rightarrow 17$

#### Refinement

Refinement on  $F^2$   
 Least-squares matrix: full  
 $R[F^2 > 2\sigma(F^2)] = 0.078$   
 $wR(F^2) = 0.236$   
 $S = 0.95$   
 3045 reflections  
 288 parameters  
 0 restraints  
 Hydrogen site location: mixed

H atoms treated by a mixture of independent and constrained refinement  
 $w = 1/[\sigma^2(F_o^2) + (0.1078P)^2]$   
 where  $P = (F_o^2 + 2F_c^2)/3$   
 $(\Delta/\sigma)_{\max} < 0.001$   
 $\Delta\rho_{\max} = 0.31$  e Å<sup>-3</sup>  
 $\Delta\rho_{\min} = -0.30$  e Å<sup>-3</sup>  
 Extinction correction: *SHELXL2017/1* (Sheldrick 2017),  $F_c^* = kFc[1 + 0.001xFc^2\lambda^3/\sin(2\theta)]^{-1/4}$   
 Extinction coefficient: 0.0035 (10)

#### Special details

*Geometry.* All e.s.d.'s (except the e.s.d. in the dihedral angle between two l.s. planes) are estimated using the full covariance matrix. The cell e.s.d.'s are taken into account individually in the estimation of e.s.d.'s in distances, angles and torsion angles; correlations between e.s.d.'s in cell parameters are only used when they are defined by crystal symmetry. An approximate (isotropic) treatment of cell e.s.d.'s is used for estimating e.s.d.'s involving l.s. planes.

*Fractional atomic coordinates and isotropic or equivalent isotropic displacement parameters ( $\text{\AA}^2$ )*

|      | <i>x</i>     | <i>y</i>   | <i>z</i>   | $U_{\text{iso}}^*/U_{\text{eq}}$ |
|------|--------------|------------|------------|----------------------------------|
| O1   | -0.0788 (7)  | 0.4304 (3) | 0.6492 (2) | 0.0468 (10)                      |
| O2   | 0.2337 (7)   | 0.4963 (3) | 0.5600 (2) | 0.0508 (10)                      |
| O3   | 0.1501 (7)   | 0.1488 (3) | 0.6235 (2) | 0.0488 (10)                      |
| O4   | 1.6292 (7)   | 0.0299 (3) | 0.2504 (2) | 0.0509 (10)                      |
| N1   | 0.5043 (9)   | 0.2310 (4) | 0.5091 (3) | 0.0481 (12)                      |
| N2   | 1.4189 (8)   | 0.0474 (3) | 0.3061 (3) | 0.0476 (12)                      |
| N3   | -0.7598 (8)  | 0.3124 (3) | 0.8508 (3) | 0.0497 (12)                      |
| C2   | 0.1317 (10)  | 0.4204 (4) | 0.5935 (3) | 0.0446 (13)                      |
| C3   | 0.2045 (10)  | 0.3222 (4) | 0.5827 (3) | 0.0446 (13)                      |
| C4   | 0.0814 (10)  | 0.2354 (4) | 0.6309 (4) | 0.0444 (13)                      |
| C4A  | -0.1334 (10) | 0.2517 (4) | 0.6891 (3) | 0.0462 (14)                      |
| C5   | -0.2727 (10) | 0.1752 (4) | 0.7397 (3) | 0.0500 (14)                      |
| H5   | -0.227347    | 0.108428   | 0.736548   | 0.060*                           |
| C6   | -0.4752 (11) | 0.1926 (4) | 0.7944 (4) | 0.0514 (15)                      |
| H6   | -0.564038    | 0.137790   | 0.829246   | 0.062*                           |
| C7   | -0.5524 (10) | 0.2929 (4) | 0.7991 (3) | 0.0474 (14)                      |
| C8   | -0.4099 (10) | 0.3699 (4) | 0.7479 (3) | 0.0499 (15)                      |
| H8   | -0.453032    | 0.437275   | 0.749783   | 0.060*                           |
| C8A  | -0.2071 (10) | 0.3483 (4) | 0.6947 (3) | 0.0446 (13)                      |
| C9   | 0.4116 (10)  | 0.3173 (4) | 0.5241 (3) | 0.0481 (14)                      |
| H9   | 0.488453     | 0.377199   | 0.494113   | 0.058*                           |
| C10  | 0.7095 (10)  | 0.2159 (4) | 0.4498 (3) | 0.0451 (13)                      |
| C11  | 0.8530 (11)  | 0.2908 (5) | 0.4014 (4) | 0.0517 (15)                      |
| H11  | 0.816318     | 0.357654   | 0.404868   | 0.062*                           |
| C11A | 0.7595 (11)  | 0.1188 (4) | 0.4452 (3) | 0.0499 (14)                      |
| H11A | 0.659869     | 0.067456   | 0.479689   | 0.060*                           |
| C12  | 1.0538 (11)  | 0.2671 (4) | 0.3472 (4) | 0.0494 (14)                      |
| H12  | 1.154779     | 0.318520   | 0.313696   | 0.059*                           |
| C12A | 0.9573 (10)  | 0.0964 (4) | 0.3895 (3) | 0.0476 (14)                      |
| H12A | 0.988212     | 0.030209   | 0.384674   | 0.057*                           |
| C13  | 1.1096 (10)  | 0.1698 (4) | 0.3410 (3) | 0.0452 (14)                      |
| C14  | 1.3299 (10)  | 0.1438 (4) | 0.2855 (3) | 0.0445 (14)                      |
| C15  | 1.4469 (11)  | 0.2280 (4) | 0.2161 (4) | 0.0563 (16)                      |
| H15A | 1.560776     | 0.199267   | 0.177356   | 0.084*                           |
| H15B | 1.552583     | 0.259853   | 0.245621   | 0.084*                           |
| H15C | 1.303735     | 0.279871   | 0.180009   | 0.084*                           |
| C16  | -0.8801 (11) | 0.2306 (5) | 0.9142 (4) | 0.0559 (16)                      |
| H16A | -0.910694    | 0.181759   | 0.885129   | 0.067*                           |
| H16B | -1.055195    | 0.260267   | 0.930479   | 0.067*                           |
| C16A | -0.8491 (10) | 0.4164 (4) | 0.8489 (4) | 0.0513 (15)                      |
| H16C | -1.037958    | 0.422370   | 0.865753   | 0.062*                           |
| H16D | -0.839236    | 0.464459   | 0.786710   | 0.062*                           |
| C17  | -0.7122 (12) | 0.1715 (5) | 1.0000 (4) | 0.0637 (17)                      |
| H17A | -0.540166    | 0.138940   | 0.984326   | 0.076*                           |
| H17B | -0.675137    | 0.220524   | 1.028071   | 0.076*                           |
| C17A | -0.6942 (11) | 0.4506 (5) | 0.9099 (4) | 0.0566 (16)                      |
| H17C | -0.703942    | 0.403676   | 0.972578   | 0.068*                           |
| H17D | -0.505263    | 0.446324   | 0.893145   | 0.068*                           |
| C18  | -0.8478 (13) | 0.0896 (5) | 1.0667 (4) | 0.0743 (19)                      |

|      |              |            |            |             |
|------|--------------|------------|------------|-------------|
| H18A | -1.017294    | 0.121517   | 1.083097   | 0.111*      |
| H18B | -0.733840    | 0.054565   | 1.120377   | 0.111*      |
| H18C | -0.880117    | 0.039655   | 1.039944   | 0.111*      |
| C18A | -0.8033 (12) | 0.5598 (4) | 0.9034 (4) | 0.0612 (17) |
| H18D | -0.795069    | 0.606263   | 0.841313   | 0.092*      |
| H18E | -0.697151    | 0.580171   | 0.942203   | 0.092*      |
| H18F | -0.988237    | 0.563510   | 0.922371   | 0.092*      |
| H4O  | 1.715 (13)   | -0.037 (5) | 0.283 (4)  | 0.092*      |
| H1N  | 0.423 (12)   | 0.182 (5)  | 0.542 (4)  | 0.073*      |

*Atomic displacement parameters (Å<sup>2</sup>)*

|      | $U^{11}$  | $U^{22}$  | $U^{33}$  | $U^{12}$     | $U^{13}$    | $U^{23}$     |
|------|-----------|-----------|-----------|--------------|-------------|--------------|
| O1   | 0.048 (2) | 0.046 (2) | 0.045 (2) | -0.0051 (17) | 0.0013 (18) | -0.0145 (18) |
| O2   | 0.052 (2) | 0.047 (2) | 0.052 (2) | -0.0075 (19) | 0.0055 (18) | -0.0153 (19) |
| O3   | 0.052 (2) | 0.038 (2) | 0.055 (2) | -0.0048 (18) | 0.0073 (18) | -0.0164 (19) |
| O4   | 0.050 (2) | 0.045 (2) | 0.057 (2) | -0.0036 (18) | 0.0113 (19) | -0.0193 (19) |
| N1   | 0.049 (3) | 0.042 (3) | 0.050 (3) | -0.001 (2)   | 0.002 (2)   | -0.014 (2)   |
| N2   | 0.045 (3) | 0.045 (3) | 0.052 (3) | -0.003 (2)   | 0.008 (2)   | -0.018 (2)   |
| N3   | 0.047 (3) | 0.047 (3) | 0.048 (3) | -0.006 (2)   | 0.009 (2)   | -0.010 (2)   |
| C2   | 0.044 (3) | 0.050 (4) | 0.037 (3) | -0.005 (3)   | 0.004 (3)   | -0.014 (3)   |
| C3   | 0.039 (3) | 0.049 (3) | 0.044 (3) | -0.002 (3)   | 0.002 (3)   | -0.016 (3)   |
| C4   | 0.039 (3) | 0.039 (3) | 0.053 (3) | -0.001 (3)   | -0.008 (3)  | -0.015 (3)   |
| C4A  | 0.040 (3) | 0.047 (4) | 0.048 (3) | -0.007 (3)   | -0.002 (3)  | -0.012 (3)   |
| C5   | 0.051 (3) | 0.046 (4) | 0.049 (3) | -0.005 (3)   | 0.000 (3)   | -0.013 (3)   |
| C6   | 0.051 (3) | 0.048 (4) | 0.051 (3) | -0.009 (3)   | 0.004 (3)   | -0.011 (3)   |
| C7   | 0.045 (3) | 0.054 (4) | 0.041 (3) | -0.008 (3)   | 0.000 (3)   | -0.014 (3)   |
| C8   | 0.049 (3) | 0.052 (4) | 0.046 (3) | 0.003 (3)    | -0.002 (3)  | -0.017 (3)   |
| C8A  | 0.046 (3) | 0.039 (3) | 0.043 (3) | -0.009 (3)   | 0.003 (3)   | -0.007 (3)   |
| C9   | 0.044 (3) | 0.049 (4) | 0.046 (3) | -0.002 (3)   | -0.005 (3)  | -0.012 (3)   |
| C10  | 0.040 (3) | 0.050 (4) | 0.042 (3) | -0.002 (3)   | 0.004 (3)   | -0.015 (3)   |
| C11  | 0.050 (3) | 0.052 (4) | 0.051 (3) | -0.005 (3)   | 0.000 (3)   | -0.018 (3)   |
| C11A | 0.053 (3) | 0.044 (4) | 0.047 (3) | -0.006 (3)   | 0.004 (3)   | -0.009 (3)   |
| C12  | 0.052 (3) | 0.043 (3) | 0.050 (3) | -0.004 (3)   | 0.007 (3)   | -0.015 (3)   |
| C12A | 0.049 (3) | 0.040 (3) | 0.049 (3) | -0.007 (3)   | 0.001 (3)   | -0.010 (3)   |
| C13  | 0.046 (3) | 0.046 (3) | 0.045 (3) | -0.008 (3)   | -0.004 (3)  | -0.016 (3)   |
| C14  | 0.037 (3) | 0.048 (4) | 0.046 (3) | -0.008 (3)   | -0.001 (2)  | -0.013 (3)   |
| C15  | 0.059 (4) | 0.050 (4) | 0.055 (3) | -0.006 (3)   | 0.007 (3)   | -0.013 (3)   |
| C16  | 0.050 (3) | 0.067 (4) | 0.044 (3) | -0.005 (3)   | 0.007 (3)   | -0.015 (3)   |
| C16A | 0.037 (3) | 0.064 (4) | 0.051 (3) | -0.005 (3)   | -0.002 (3)  | -0.019 (3)   |
| C17  | 0.059 (4) | 0.076 (5) | 0.051 (4) | -0.010 (3)   | 0.000 (3)   | -0.016 (3)   |
| C17A | 0.044 (3) | 0.071 (4) | 0.056 (4) | -0.007 (3)   | 0.007 (3)   | -0.024 (3)   |
| C18  | 0.084 (5) | 0.074 (5) | 0.056 (4) | -0.016 (4)   | -0.003 (4)  | -0.011 (4)   |
| C18A | 0.078 (4) | 0.055 (4) | 0.050 (3) | -0.025 (3)   | 0.008 (3)   | -0.012 (3)   |

*Geometric parameters (Å, °)*

|        |           |           |           |
|--------|-----------|-----------|-----------|
| O1—C8A | 1.382 (6) | C11—H11   | 0.9500    |
| O1—C2  | 1.391 (6) | C11A—C12A | 1.393 (7) |
| O2—C2  | 1.207 (6) | C11A—H11A | 0.9500    |
| O3—C4  | 1.260 (6) | C12—C13   | 1.391 (7) |
| O4—N2  | 1.416 (5) | C12—H12   | 0.9500    |



|             |           |                |           |
|-------------|-----------|----------------|-----------|
| O4—H4O      | 0.94 (7)  | C12A—C13       | 1.387 (7) |
| N1—C9       | 1.330 (7) | C12A—H12A      | 0.9500    |
| N1—C10      | 1.428 (7) | C13—C14        | 1.487 (7) |
| N1—H1N      | 0.87 (6)  | C14—C15        | 1.497 (7) |
| N2—C14      | 1.287 (6) | C15—H15A       | 0.9800    |
| N3—C7       | 1.371 (6) | C15—H15B       | 0.9800    |
| N3—C16      | 1.446 (7) | C15—H15C       | 0.9800    |
| N3—C16A     | 1.453 (7) | C16—C17        | 1.533 (8) |
| C2—C3       | 1.441 (7) | C16—H16A       | 0.9900    |
| C3—C9       | 1.396 (7) | C16—H16B       | 0.9900    |
| C3—C4       | 1.425 (7) | C16A—C17A      | 1.521 (7) |
| C4—C4A      | 1.455 (7) | C16A—H16C      | 0.9900    |
| C4A—C5      | 1.383 (7) | C16A—H16D      | 0.9900    |
| C4A—C8A     | 1.385 (7) | C17—C18        | 1.510 (8) |
| C5—C6       | 1.378 (7) | C17—H17A       | 0.9900    |
| C5—H5       | 0.9500    | C17—H17B       | 0.9900    |
| C6—C7       | 1.432 (7) | C17A—C18A      | 1.517 (8) |
| C6—H6       | 0.9500    | C17A—H17C      | 0.9900    |
| C7—C8       | 1.399 (7) | C17A—H17D      | 0.9900    |
| C8—C8A      | 1.380 (7) | C18—H18A       | 0.9800    |
| C8—H8       | 0.9500    | C18—H18B       | 0.9800    |
| C9—H9       | 0.9500    | C18—H18C       | 0.9800    |
| C10—C11     | 1.371 (7) | C18A—H18D      | 0.9800    |
| C10—C11A    | 1.379 (7) | C18A—H18E      | 0.9800    |
| C11—C12     | 1.394 (7) | C18A—H18F      | 0.9800    |
|             |           |                |           |
| C8A—O1—C2   | 121.3 (4) | C13—C12A—C11A  | 120.7 (5) |
| N2—O4—H4O   | 103 (4)   | C13—C12A—H12A  | 119.7     |
| C9—N1—C10   | 127.6 (5) | C11A—C12A—H12A | 119.7     |
| C9—N1—H1N   | 110 (4)   | C12A—C13—C12   | 118.3 (5) |
| C10—N1—H1N  | 123 (4)   | C12A—C13—C14   | 120.4 (5) |
| C14—N2—O4   | 111.6 (4) | C12—C13—C14    | 121.2 (5) |
| C7—N3—C16   | 121.9 (5) | N2—C14—C13     | 115.5 (5) |
| C7—N3—C16A  | 120.2 (5) | N2—C14—C15     | 124.4 (5) |
| C16—N3—C16A | 117.7 (4) | C13—C14—C15    | 119.9 (5) |
| O2—C2—O1    | 115.1 (5) | C14—C15—H15A   | 109.5     |
| O2—C2—C3    | 127.5 (5) | C14—C15—H15B   | 109.5     |
| O1—C2—C3    | 117.4 (5) | H15A—C15—H15B  | 109.5     |
| C9—C3—C4    | 122.4 (5) | C14—C15—H15C   | 109.5     |
| C9—C3—C2    | 115.1 (5) | H15A—C15—H15C  | 109.5     |
| C4—C3—C2    | 122.5 (5) | H15B—C15—H15C  | 109.5     |
| O3—C4—C3    | 122.6 (5) | N3—C16—C17     | 113.7 (5) |
| O3—C4—C4A   | 120.9 (5) | N3—C16—H16A    | 108.8     |
| C3—C4—C4A   | 116.6 (5) | C17—C16—H16A   | 108.8     |
| C5—C4A—C8A  | 117.2 (5) | N3—C16—H16B    | 108.8     |
| C5—C4A—C4   | 123.3 (5) | C17—C16—H16B   | 108.8     |
| C8A—C4A—C4  | 119.5 (5) | H16A—C16—H16B  | 107.7     |
| C6—C5—C4A   | 122.1 (5) | N3—C16A—C17A   | 115.5 (5) |
| C6—C5—H5    | 118.9     | N3—C16A—H16C   | 108.4     |
| C4A—C5—H5   | 118.9     | C17A—C16A—H16C | 108.4     |
| C5—C6—C7    | 120.3 (5) | N3—C16A—H16D   | 108.4     |
| C5—C6—H6    | 119.9     | C17A—C16A—H16D | 108.4     |

|                |            |                   |            |
|----------------|------------|-------------------|------------|
| C7—C6—H6       | 119.9      | H16C—C16A—H16D    | 107.5      |
| N3—C7—C8       | 121.8 (5)  | C18—C17—C16       | 112.6 (5)  |
| N3—C7—C6       | 121.0 (5)  | C18—C17—H17A      | 109.1      |
| C8—C7—C6       | 117.2 (5)  | C16—C17—H17A      | 109.1      |
| C8A—C8—C7      | 120.3 (5)  | C18—C17—H17B      | 109.1      |
| C8A—C8—H8      | 119.9      | C16—C17—H17B      | 109.1      |
| C7—C8—H8       | 119.9      | H17A—C17—H17B     | 107.8      |
| C8—C8A—O1      | 114.5 (5)  | C18A—C17A—C16A    | 111.3 (5)  |
| C8—C8A—C4A     | 122.8 (5)  | C18A—C17A—H17C    | 109.4      |
| O1—C8A—C4A     | 122.6 (5)  | C16A—C17A—H17C    | 109.4      |
| N1—C9—C3       | 121.8 (6)  | C18A—C17A—H17D    | 109.4      |
| N1—C9—H9       | 119.1      | C16A—C17A—H17D    | 109.4      |
| C3—C9—H9       | 119.1      | H17C—C17A—H17D    | 108.0      |
| C11—C10—C11A   | 121.3 (5)  | C17—C18—H18A      | 109.5      |
| C11—C10—N1     | 123.4 (5)  | C17—C18—H18B      | 109.5      |
| C11A—C10—N1    | 115.2 (5)  | H18A—C18—H18B     | 109.5      |
| C10—C11—C12    | 118.8 (6)  | C17—C18—H18C      | 109.5      |
| C10—C11—H11    | 120.6      | H18A—C18—H18C     | 109.5      |
| C12—C11—H11    | 120.6      | H18B—C18—H18C     | 109.5      |
| C10—C11A—C12A  | 119.5 (5)  | C17A—C18A—H18D    | 109.5      |
| C10—C11A—H11A  | 120.3      | C17A—C18A—H18E    | 109.5      |
| C12A—C11A—H11A | 120.3      | H18D—C18A—H18E    | 109.5      |
| C13—C12—C11    | 121.4 (5)  | C17A—C18A—H18F    | 109.5      |
| C13—C12—H12    | 119.3      | H18D—C18A—H18F    | 109.5      |
| C11—C12—H12    | 119.3      | H18E—C18A—H18F    | 109.5      |
|                |            |                   |            |
| C8A—O1—C2—O2   | -177.4 (4) | C4—C4A—C8A—C8     | 179.5 (5)  |
| C8A—O1—C2—C3   | 2.2 (7)    | C5—C4A—C8A—O1     | 178.4 (5)  |
| O2—C2—C3—C9    | -2.3 (8)   | C4—C4A—C8A—O1     | -2.2 (8)   |
| O1—C2—C3—C9    | 178.2 (4)  | C10—N1—C9—C3      | 178.4 (5)  |
| O2—C2—C3—C4    | 175.3 (5)  | C4—C3—C9—N1       | 0.8 (8)    |
| O1—C2—C3—C4    | -4.2 (7)   | C2—C3—C9—N1       | 178.4 (5)  |
| C9—C3—C4—O3    | -0.4 (8)   | C9—N1—C10—C11     | 3.4 (8)    |
| C2—C3—C4—O3    | -177.9 (5) | C9—N1—C10—C11A    | -177.9 (5) |
| C9—C3—C4—C4A   | -179.6 (5) | C11A—C10—C11—C12  | -0.3 (8)   |
| C2—C3—C4—C4A   | 3.0 (7)    | N1—C10—C11—C12    | 178.4 (5)  |
| O3—C4—C4A—C5   | 0.5 (8)    | C11—C10—C11A—C12A | -0.8 (8)   |
| C3—C4—C4A—C5   | 179.6 (5)  | N1—C10—C11A—C12A  | -179.6 (5) |
| O3—C4—C4A—C8A  | -179.0 (5) | C10—C11—C12—C13   | 0.3 (8)    |
| C3—C4—C4A—C8A  | 0.2 (7)    | C10—C11A—C12A—C13 | 2.1 (8)    |
| C8A—C4A—C5—C6  | -0.7 (8)   | C11A—C12A—C13—C12 | -2.1 (8)   |
| C4—C4A—C5—C6   | 179.9 (5)  | C11A—C12A—C13—C14 | 176.7 (5)  |
| C4A—C5—C6—C7   | 1.4 (8)    | C11—C12—C13—C12A  | 0.9 (8)    |
| C16—N3—C7—C8   | -170.1 (5) | C11—C12—C13—C14   | -177.9 (5) |
| C16A—N3—C7—C8  | 4.2 (7)    | O4—N2—C14—C13     | -179.5 (4) |
| C16—N3—C7—C6   | 10.8 (8)   | O4—N2—C14—C15     | -4.5 (7)   |
| C16A—N3—C7—C6  | -174.9 (5) | C12A—C13—C14—N2   | -20.3 (7)  |
| C5—C6—C7—N3    | 177.6 (5)  | C12—C13—C14—N2    | 158.5 (5)  |
| C5—C6—C7—C8    | -1.5 (8)   | C12A—C13—C14—C15  | 164.4 (5)  |
| N3—C7—C8—C8A   | -178.2 (5) | C12—C13—C14—C15   | -16.8 (8)  |
| C6—C7—C8—C8A   | 0.9 (8)    | C7—N3—C16—C17     | 75.6 (7)   |
| C7—C8—C8A—O1   | -178.7 (5) | C16A—N3—C16—C17   | -98.8 (6)  |

---

|               |           |                   |            |
|---------------|-----------|-------------------|------------|
| C7—C8—C8A—C4A | -0.2 (8)  | C7—N3—C16A—C17A   | -83.8 (6)  |
| C2—O1—C8A—C8  | 179.4 (4) | C16—N3—C16A—C17A  | 90.7 (6)   |
| C2—O1—C8A—C4A | 1.0 (7)   | N3—C16—C17—C18    | 177.5 (5)  |
| C5—C4A—C8A—C8 | 0.1 (8)   | N3—C16A—C17A—C18A | -179.8 (5) |

---

*Hydrogen-bond geometry (Å, °)*

---

| <i>D</i> —H··· <i>A</i>  | <i>D</i> —H | H··· <i>A</i> | <i>D</i> ··· <i>A</i> | <i>D</i> —H··· <i>A</i> |
|--------------------------|-------------|---------------|-----------------------|-------------------------|
| O4—H4O···O3 <sup>i</sup> | 0.94 (7)    | 1.80 (7)      | 2.707 (5)             | 160 (6)                 |
| N1—H1N···O3              | 0.87 (6)    | 1.87 (6)      | 2.626 (5)             | 145 (6)                 |

---

Symmetry code: (i)  $-x+2, -y, -z+1$ .

## 11. REFERENCES:

1. Sheldrick, G. M., A short history of SHELX. *Acta Crystallogr., Sect A* **2008**, *64*, 112.
2. Sheldrick, G. M., Crystal structure refinement with SHELXL. *Acta Crystallogr., Sect C* **2015**, *71*, 3-8.
3. Barbour, L. J., X-Seed—A software tool for supramolecular crystallography. *J. Supramol. Chem.* **2001**, *1*, 189-191.
4. Ge, J.-F.; Arai, C.; Kaiser, M.; Wittlin, S.; Brun, R.; Ihara, M., Synthesis and in vitro antiprotozoal activities of water-soluble, inexpensive 3, 7-bis (dialkylamino) phenoxazin-5-ium derivatives. *J. Med. Chem.* **2008**, *51* (12), 3654-3658.
5. Davis, A. B.; Lambert, R. E.; Fronczek, F. R.; Cragg, P. J.; Wallace, K. J., An activated coumarin-enamine Michael acceptor for  $\text{CN}^-$ . *New J. Chem.* **2014**, *38* (10), 4678-4683.
6. Wallace, K. J.; Fagbemi, R. I.; Folmer-Andersen, F. J.; Morey, J.; Lynth, V. M. a.; Anslyn, E. V., Detection of chemical warfare simulants by phosphorylation of a coumarin oximate. *Chem. Commun.* **2006**, 3886-3888.
7. Mia, R.; Cragg, P. J.; Wallace, K. J., Low Molecular Weight Fluorescent Probes for the detection of organophosphates. *J. Lumin.* **2021**, *235*, 118053.
8. *Spartan '20* (v 1.1.1), Wavefunction Inc., 18401 Von Karman Ave., Suite 435, Irvine, CA 92612, USA
